1 **Amount and intensity of physical activity and risk of incident cancer in the UK Biobank**

2 Ms. Alaina H. Shreves, M.S.<sup>1-3</sup>; Dr. Scott R. Small, DPhil.<sup>1,2,4</sup>; Dr. Rosemary Walmsley<sup>1,2</sup>; DPhil;  
3 Dr. Shing Chan, DPhil<sup>1,2</sup>; Dr. Pedro F. Saint-Maurice, Ph.D.<sup>3,6</sup>; Dr. Steven C. Moore, Ph.D.<sup>3</sup>; Dr.  
4 Keren Papier, Ph.D.<sup>5</sup>; Dr. Kezia Gaitskell, D.Phil.<sup>5</sup>; Dr. Ruth C. Travis, DPhil<sup>5</sup>; Dr. Charles E.  
5 Matthews, Ph.D.<sup>3</sup>; Dr. Aiden Doherty, Ph.D.<sup>1,2</sup>

6 **Affiliations:**

7 <sup>1</sup> Nuffield Department of Population Health, University of Oxford, UK.

8 <sup>2</sup> Big Data Institute, Li Ka Shing Centre for Health Information and Discovery, University of  
9 Oxford, Oxford, UK.

10 <sup>3</sup> Division of Cancer Epidemiology and Genetics, National Cancer Institute, National Institutes of  
11 Health, Bethesda, MD, USA.

12 <sup>4</sup> Nuffield Department of Orthopaedics, Rheumatology and Musculoskeletal Sciences, University  
13 of Oxford, Oxford, UK.

14 <sup>5</sup> Cancer Epidemiology Unit, Nuffield Department of Population Health, University of Oxford,  
15 Oxford, UK.

16 <sup>6</sup> Breast Cancer Unit, Champalimaud Foundation, Lisbon, Portugal.

17

18 **Corresponding author:**

19 Aiden Doherty, Ph.D.

20 Professor of Biomedical Informatics

21 University of Oxford

22 Nuffield Department of Population Health

23 Big Data Institute, Old Road Campus

24 Oxford, UK OX3 7LF

25 Email: [aiden.doherty@ndph.ox.ac.uk](mailto:aiden.doherty@ndph.ox.ac.uk)

26

27 **Manuscript word count:** 2 989 words

28 **KEY POINTS**

29 **Question:** What insights can we gain about the relationships between total daily activity, step  
30 counts, and activity intensity on cancer risk using accelerometer data?

31 **Findings:** In an analysis of 86 556 individuals from the UK Biobank who provided a week of  
32 accelerometer-based activity data, higher levels of total physical activity, reducing sedentary time  
33 in favour of light or moderate-vigorous intensity activities, and higher daily step counts were  
34 associated with a lower risk of certain cancers.

35 **Meaning:** For less active adults, increasing activity time and accumulating more daily steps may  
36 be practical interventions for lowering the risk of some cancers.

37 **ABSTRACT**

38 **Importance:** The influence of total daily and light intensity activity on cancer risk remains  
39 unclear, as most existing knowledge is drawn from studies relying on self-reported leisure-time  
40 activities of moderate-vigorous intensity.

41 **Objective:** To investigate associations between total daily activity, including step counts, and  
42 activity intensity on incident cancer risk.

43 **Design, Setting, and Participants:** Prospective analysis of cancer-free UK Biobank participants  
44 who wore accelerometers for 7-days (between 2013-2015), followed for cancer incidence through  
45 national registries (mean follow-up 5.8 years (SD=1.3)).

46 **Exposures:** Time-series machine learning models derived daily total activity (average  
47 acceleration), behaviour time, step counts, and peak 30-minute cadence from wrist-based  
48 accelerometer data.

49 **Main Outcomes and Measures:** A composite cancer outcome of 13 cancers previously associated  
50 with low physical activity (bladder, breast, colon, endometrial, oesophageal adenocarcinoma,  
51 gastric cardia, head and neck, kidney, liver, lung, myeloid leukaemia, myeloma, and rectum) based  
52 on previous studies of self-reported activity. Cox proportional hazards regression models estimated  
53 hazard ratios (HR) and 95% confidence intervals (CI), adjusted for age, sex, ethnicity, smoking,  
54 alcohol, education, Townsend Deprivation Index, and reproductive factors. Associations of  
55 reducing sedentary time in favour of increased light and moderate-vigorous activity were  
56 examined using compositional data analyses.

57 **Results:** Among 86 556 participants (mean age 62.0 years (SD=7.9) at accelerometer assessment),  
58 2 669 cancers occurred. Higher total physical activity was associated with a lower overall cancer  
59 risk ( $HR_{1SD}=0.85$ , [95%CI 0.81-0.89]). On average, reallocating one hour/day from sedentary  
60 behaviour to moderate-vigorous physical activity was associated with a lower risk ( $HR=0.92$ ,  
61 [0.89-0.95]), as was reallocating one hour/day to light-intensity physical activity ( $HR=0.94$ , [0.92-  
62 0.96]). Compared to individuals taking 5 000 daily steps, those who took 9 000 steps had an 18%  
63 lower risk of physical-activity-related cancer ( $HR=0.82$ , [0.74-0.90]). We found no significant  
64 association with peak 30-minute cadence after adjusting for total steps.

65 **Conclusion and Relevance:** Higher total daily physical activity and less sedentary time, in favour  
66 of both light and moderate-vigorous intensity activity, were associated with a lower risk of certain  
67 cancers. For less active adults, increasing step counts by 4 000 daily steps may be a practical public  
68 health intervention for lowering the risk of some cancers.

## 69 INTRODUCTION

70 Epidemiological data indicate that over half of all new cancers in high-income countries could be  
71 avoided by modifying lifestyle factors, including addressing physical inactivity.<sup>1,2</sup> However,  
72 quantifying the dose-dependent benefits of specific physical activity (PA) behaviours for cancer  
73 prevention remains challenging. Many existing studies rely on self-report questionnaires, which  
74 emphasize time spent in leisure-time activities of a moderate-vigorous intensity and may have  
75 recall errors and reporting biases.<sup>3,4</sup> Time use data studies suggest that most individuals spend a  
76 significant amount of time devoted to work and household activities, with the majority of  
77 physically active time obtained from light-intensity physical activity (LIPA).<sup>5-7</sup> Global adherence  
78 to PA recommendations, which primarily emphasize moderate-vigorous physical activity  
79 (MVPA), is generally poor.<sup>8</sup> Consequently, there is a growing interest in understanding whether  
80 more accurate measures of MVPA show protective effects for cancer risk and if interventions to  
81 increase LIPA could be a valuable disease prevention strategy.

82 Wearable accelerometer devices provide objective measures of all daily activities, including  
83 sedentary and physically active time accumulated at home, work, during transportation, and in  
84 leisure-time.<sup>9</sup> Accelerometer data can also be used to investigate how reallocating time from  
85 sedentary behaviour to either LIPA or MVPA could influence disease risk. Existing accelerometer-  
86 measured activity studies in cancer have primarily focused on cancer mortality and,<sup>10-14</sup> to a  
87 limited extent, breast cancer risk.<sup>15,16</sup>

88 To address these gaps and challenges, we aimed to understand the relationship between total daily  
89 activity and intensity, step counts, and incident cancer risk using a composite outcome of 13 cancer

90 sites previously associated with low PA in studies of self-reported leisure time activity.<sup>17</sup> As a  
91 secondary analysis, we assessed the risks for all 13 PA-related cancers individually and, as case  
92 numbers allowed, for other site-specific cancers. We also conducted compositional data analyses  
93 to explore the impact of reallocating time from sedentary behaviour to LIPA and MVPA. Finally,  
94 for potential translation to the clinical and public health settings, we examined the dose-response  
95 relationship between step count, stepping intensity, and incident cancer. Step counts are an easily  
96 understandable metric among the general population and are reported by many consumer wearable  
97 devices and fitness trackers.<sup>18</sup>

## 98 **METHODS**

### 99 **Study population**

100 The UK Biobank is a prospective study that enrolled 502 536 adults in England, Scotland, and  
101 Wales between 2006-2010.<sup>19,20</sup> At baseline, participants completed a questionnaire, provided  
102 biological data, and consented for linkage to electronic medical records. From June 2013 to  
103 December 2015, participants with valid emails were invited to wear an Axivity AX3 wrist-worn  
104 accelerometer for 7 days.<sup>7</sup>

### 105 **Accelerometer data processing**

106 Accelerometer data were processed using methods described by Doherty (“accelerometer”,  
107 v7.1.0).<sup>21</sup> Total physical activity (PA) was calculated as the mean vector magnitude per epoch to  
108 derive an overall mean per day acceleration in milligravity (mg) units. This metric reflects the  
109 activity duration and intensity and has been validated against doubly labelled water.<sup>21</sup>

110 Proportions of time spent across sleep, sedentary behaviour (SB), light-intensity physical activity  
111 (LIPA), and moderate-vigorous physical activity (MVPA) per day, were calculated using random  
112 forest and hidden Markov model machine-learning methods.<sup>7</sup> Missing time due to non-wear was  
113 imputed by averaging the behaviour in the corresponding times across all valid days.<sup>7</sup>

114 Step counts were calculated using a hybrid self-supervised learning model trained on ground truth  
115 free-living stepping data (“stepcount”, v3.1.1).<sup>22</sup> Daily step count was reported as the median  
116 number of daily steps during the seven-day measurement period. Peak 30-minute cadence was  
117 calculated as the mean of the 30 highest daily cadence values, averaged across all days.<sup>23</sup> Further  
118 processing details are described in eTable 1.

## 119 **Outcome ascertainment**

120 The main outcome was a composite cancer outcome of 13 sites previously found to be associated  
121 with low PA (bladder, breast, colon, endometrial, oesophageal adenocarcinoma, gastric cardia,  
122 head and neck, kidney, liver, lung, myeloid leukaemia, myeloma, and rectal).<sup>17</sup> Cancers were  
123 obtained by the UK Biobank through the National Health Service (NHS) Digital for participants  
124 from England and Wales and the NHS Central Register for participants from Scotland (details in  
125 eTable 2).<sup>24</sup> In secondary analyses, we assessed the risks for cancers not previously related to PA  
126 with at least 100 cases (eTable 3).

## 127 **Analytic sample**

128 Raw accelerometer data from 103 614 participants were processed, excluding study withdrawals.  
129 We further excluded participants with device calibration or data reading errors (>1% of values

130 outside +/-8g range), inadequate wear time (<72 hours), unreasonably high average acceleration  
131 (>100 mg), and lacking steps data.{Citation} Individuals with cancer (excluding C44: non-  
132 melanoma skin cancer) before accelerometer wear and missing healthcare linkages or covariate  
133 data, were also excluded. The final analysis included 86 556 participants (eFigure 1).

#### 134 **Statistical analysis**

135 Cox proportional hazards regression models estimated adjusted Hazard ratios (HRs) with 95%  
136 confidence intervals for a one standard deviation (SD) increase in total activity and incident cancer.  
137 We also assessed risks across quintiles of physical activity.

138 Attained age was the underlying time scale. Individuals who were cancer-free during follow-up  
139 were censored at their date of death or at the end of the follow-up period (31 December 2020,  
140 England; 31 December 2016, Wales; 30 November 2021 Scotland).

141 Multivariable models adjusted for sex (male, female), ethnicity (White, non-White), smoking  
142 status (never, previous, current unknown cigarettes/day, current <15 cigarettes/day, current  $\geq$ 15  
143 cigarettes/day), alcohol consumption (never, <3 times per week,  $\geq$ 3 times per week), education  
144 (school leaver, further education, higher education), and deprivation based on the Townsend  
145 Deprivation Index (TDI) (quintiles ranging from least deprived to most deprived, based on the  
146 2011 UK census).<sup>25</sup> Female-specific models were further adjusted for oral contraception ever use  
147 (no, yes, missing), hormone replacement therapy ever use (no, yes, missing), menopausal status  
148 (no, yes, missing/unknown), and parity (0, 1-2, 3+, missing). Covariate data were provided by  
149 participants at the UK Biobank baseline assessment and were chosen a priori based on existing



150 studies (Details in eTable 1). No violations of the proportional hazards assumption were observed  
151 for the exposures using Schoenfeld residuals.

152 Compositional data analyses, using the "epicoda" package, modelled associations between the  
153 relative time spent in SB, LIPA, MVPA, and sleep and cancer risk.<sup>7</sup> First, we calculated the  
154 estimated HR associated with reallocating time to one behaviour from all other proportionally  
155 (e.g., reallocating one hour/day to LIPA from all other behaviours proportionally).<sup>7</sup> Second, we  
156 estimated HRs for specific pairwise reallocations of time between behaviours (e.g., reallocating  
157 one hour/day from SB to LIPA, holding sleep and MVPA constant). For all compositional  
158 analyses, the estimated hazard ratios were relative to the mean behaviour composition among  
159 included participants for a hypothetical average participant.

160 Finally, we used restricted cubic splines to assess the relationship between step count and cancer  
161 incidence using a reference point at the 10th percentile and knots positioned at the 5th, 50th, and  
162 90th percentiles. We employed *P*-values for linear trends to estimate significance of the overall  
163 association. Multivariable models were further adjusted for daily step count.

164 We conducted several sensitivity analyses, including adjustment for body mass index (<25, 25-30,  
165 and 30+ kilograms/meters<sup>2</sup>) as measured at the assessment centre and dietary factors (fresh fruits  
166 and vegetable consumption (<3, 3–4.9, 5–7.9, or 8+ servings/day, missing); red and processed  
167 meat consumption (<1, 1–2.9, 3–4.9, or 5+ times/week, missing)). Two subgroup analyses were  
168 conducted, one among males and females, and the other among never smokers. To assess the  
169 potential influence of reverse causality, we repeated the analyses after excluding the first two years  
170 of follow-up. Statistical analyses were performed May–November 2023 using R (v4.2.2; R

171 Foundation for Statistical Computing). Two-sided P values of  $<0.05$  was considered statistically  
172 significant.

### 173 **Consent**

174 Participants in the UK Biobank provided written informed consent. The study was approved by  
175 the National Information Governance Board for Health and Social Care and the National Health  
176 Service North West Multicentre Research Ethics Committee (06/MRE08/65). We adhered to the  
177 Strengthening the Reporting of Observational Studies in Epidemiology (STROBE) reporting  
178 guidelines (eTable 4).<sup>26</sup>

## 179 **RESULTS**

180 Among 86 556 participants, the mean age at accelerometer assessment was 62.0 years (SD=7.9).  
181 The majority were female (56%), identified as White (97%), and fell within the least deprived  
182 quintile of the Townsend Deprivation Index (50%) (Table 1). Throughout a mean follow-up of 5.8  
183 years (SD=1.3; 504 557 person-years), 2 669 physical activity (PA)-related cancers accrued, with  
184 breast among females (n=995) being the most common (details in eTable 3).

### 185 *Total daily PA and cancer incidence*

186 Higher total PA was associated with a lower risk of PA-related cancer (hazard ratio (HR) per 1 SD  
187 (8.3 milligravity (mg) units), 0.85 [95% confidence interval (CI) 0.81-0.89]) in the multivariable-  
188 adjusted models (Figure 1; eTable 5). Similar associations were found in models assessing  
189 quintiles of total PA (eTable 6).

190 To explore which cancers contributed to this result, we also examined associations for individual  
191 cancer sites (Figure 1; eTable 5). With higher daily PA, we observed a significantly lower risk for  
192 seven types; gastric cardia (HR<sub>1SD</sub>=0.39, [95% CI 0.22-0.70]), liver (HR<sub>1SD</sub>=0.65, [0.47-0.90]),  
193 bladder (HR<sub>1SD</sub>=0.69, [0.55-0.87]), lung (HR<sub>1SD</sub>=0.75, [0.65-0.86]), endometrial (HR<sub>1SD</sub>=0.78,  
194 [0.65-0.93]), colon (HR<sub>1SD</sub>=0.84, [0.75-0.95]), and breast cancers (HR<sub>1SD</sub>=0.91, [0.85-0.97]).  
195 There were also suggestive associations (HR < 0.9) for three cancers; oesophageal adenocarcinoma  
196 (HR<sub>1SD</sub>=0.89, [0.68-1.16]), kidney (HR<sub>1SD</sub>=0.86, [0.71-1.04]), and head and neck cancers  
197 (HR<sub>1SD</sub>=0.84, [0.66-1.07]). Similar associations were found in models assessing quintiles of total  
198 PA (eTable 6).

199 In secondary analysis of non-PA-related cancer sites, we observed no protective association with  
200 prostate cancer, an inverse association with non-Hodgkin lymphoma (HR<sub>1SD</sub>=0.85, [0.75-0.97]),  
201 and suggestive inverse associations for melanoma (HR<sub>1SD</sub>=0.89, [0.79-1.01]) and pancreatic  
202 cancers (HR<sub>1SD</sub>=0.86 [0.71-1.04]).

### 203 *Compositional data analysis*

204 First, we estimated the risks associated with each behaviour individually by reallocating time to  
205 one behaviour from all others proportionally for an average individual (eFigure 2). Reallocating  
206 one hour/day to LIPA from all other behaviours was associated with a 5% lower risk of PA-related  
207 cancer (HR=0.95, [0.93-0.97]) in multivariable-adjusted models. Reallocating one hour/day to  
208 MVPA from other behaviours was associated with a 6% lower cancer risk (HR=0.93, [0.90-0.97]).  
209 Reallocating one hour/day to sedentary behaviour (SB) was associated with a significantly higher

210 cancer risk (HR=1.03, [1.01-1.06]), but reallocating one hour/day to sleep was not (HR=1.01,  
211 [0.98-1.05]).

212 Next, we estimated the risks associated with specific pairwise reallocations of time between  
213 behaviours (Figure 2; eTable 7). For an average participant, reallocating one hour/day from SB to  
214 overall physical activity (LIPA + MVPA) was associated with a 7% lower risk (HR=0.93, [0.91-  
215 0.95]) in the multivariable-adjusted model. Reallocating one hour/day from SB to MVPA alone  
216 was associated with an 8% lower cancer risk (HR=0.92, [0.89-0.95]), and reallocating one  
217 hour/day from SB to LIPA was associated with a 6% lower risk (HR=0.94, [0.92-0.96]).

### 218 *Step counts and cancer incidence*

219 Higher daily step counts were associated with a lower risk of PA-related cancers ( $P$  for  
220 trend $\leq$ 0.001) after multivariable adjustments (eTable 8; Figure 3). Compared to individuals who  
221 took 5 000 daily steps (10<sup>th</sup> percentile, reference), individuals who took 9 000 daily steps had an  
222 18% lower risk (HR=0.82, [0.74-0.90]), while those who took 13 000 steps had a 23% lower risk  
223 (HR=0.77, [0.69-0.86]). Individuals taking fewer than 5 000 steps had a higher risk.

224 Higher step intensity (peak 30-minute cadence) was associated with a lower risk of PA-related  
225 cancer prior to adjustment for total step counts (Table 2). Compared to individuals who took 70  
226 steps/minute (10<sup>th</sup> percentile, reference), individuals who took 120 steps/minute had a lower cancer  
227 risk before (HR=0.72, [0.59-0.89]), but not after adjusting for total daily steps (HR=0.88, [0.69-  
228 1.14],  $P$  for trend=0.05).

### 229 *Sensitivity analyses*

230 Associations for total PA and cancer risk were slightly attenuated after adjusting for body mass  
231 index (BMI) in models per 1-SD of total activity (eTable 5), but the direction between the quintiles  
232 was consistent (eTable 6). BMI adjustment did not substantially alter results from the  
233 compositional analyses (eFigure 3; eTable 7) or the spline models for step count (eTable 8), nor  
234 did adjusting for dietary factors (eTables 5-8, eFigure 4).

235 Sex-specific models of 1-SD differences in total PA showed that patterns of association for cancer  
236 risk were similar among males and females for most cancer sites (eTables 9-10), as were findings  
237 from the compositional data analysis (eFigure 5). Protective associations were observed for step  
238 count and PA-related cancer risk in sex-specific models (eTable 11; Figure 3). Analyses conducted  
239 among never smokers were similar to our primary analysis (eTable 12; eFigure 6). After removing  
240 the first two years of follow-up, higher activity quintiles demonstrated protective associations for  
241 cancer risk, but the impact was more attenuated in lower activity categories (eTable 13; eFigure  
242 7).

## 243 **DISCUSSION**

244 In this prospective analysis, higher total daily physical activity (PA) measured by accelerometers  
245 was associated with a composite of 13 cancers previously shown to be associated with PA in  
246 studies of self-reported leisure time activity.<sup>17</sup> We also observed lower risks for 7 of these 13  
247 cancers. Additionally, we found protective associations for minimizing sedentary time in favour  
248 of engaging in light intensity physical activity (LIPA) or moderate-vigorous physical activity  
249 (MVPA). Compared with individuals who took 5 000 steps per day, those who took 9 000 daily  
250 steps had an 18% lower risk of incident PA-related cancer. A weaker suggestive association with

251 higher step intensity was observed, but results were not significant after adjusting for total step  
252 count.

253 Results from our compositional data analysis are novel and suggest that less sedentary time in  
254 favour of LIPA or MVPA was associated with a lower risk of certain cancers. These findings align  
255 with previous studies indicating that sedentary behaviour may be associated with chronic disease  
256 risk factors and cancer development and progression.<sup>27-29</sup> Notably, our finding that any intensity  
257 of PA was beneficial contrasts with findings from cardiovascular disease research, where intensity  
258 plays a more pivotal role in determining health benefits.<sup>7,27</sup> A study by Stamatakis found that short  
259 bursts of vigorous intensity PA were associated with a lower risk of PA-related cancer among non-  
260 exercising adults.<sup>30</sup> Our findings suggests that efforts to decrease sedentary behaviour in favour of  
261 engaging in LIPA or MVPA activities, such as allocating more time to casual walking, household  
262 chores, home repairs, and gardening could also support cancer prevention efforts and might be  
263 feasible to incorporate into everyday routines. Further, our study was not limited to non-exercisers,  
264 which enhances the applicability of our findings.

265 Walking, a highly accessible and popular form of PA, is often considered an ideal exercise  
266 intervention due to its simplicity to track and minimal adverse effects.<sup>31</sup> Our findings show that  
267 higher steps counts were associated with a lower risk for PA-related cancers. In terms of step  
268 intensity, we found a weaker but non-significant association after adjusting for total step count.  
269 These findings align with our compositional model results for total PA, which suggested that LIPA  
270 and MVPA were beneficial for cancer risk. Together, this suggests that walking at any pace may  
271 provide health benefits with respect to cancer incidence.

272 Our study adds new information to a limited literature base on the association between total daily  
273 PA and incident cancers.<sup>11</sup> Previous research in the UK Biobank cohort reported protective  
274 associations for self-reported PA and cancer, and we extend these findings for many site-specific  
275 cancers.<sup>28,32</sup> Our findings align with other studies using accelerometer data that found physical  
276 activity may play a role in the prevention of PA-related cancers among older women<sup>33</sup> and for  
277 incident breast cancer.<sup>15,16</sup> In addition to finding lower risk for 7 of the 13 PA-related cancers  
278 identified by Moore and colleagues,<sup>17</sup> we also observed a protective association between total PA  
279 and non-Hodgkin lymphoma and suggestive associations for melanoma and pancreatic cancers.  
280 This suggests potential areas for future research, especially in samples with larger case counts.

281 Several hypothesized mechanisms linking higher PA with a lower cancer risk have been proposed.  
282 These mechanisms encompass hormonal changes, insulin levels, inflammation, immune function,  
283 and oxidative stress.<sup>29</sup> Some hypotheses suggest that PA may reduce cancer risk by influencing  
284 body weight, but we observed no substantial changes in model estimates after adjusting for body  
285 mass index, although measurements here were obtained several years before the accelerometer  
286 measurements, potentially introducing imprecise estimates over time.

### 287 *Strengths and limitations*

288 Our study has several strengths, including the use of accelerometer devices in a large and  
289 prospective cohort study, which reduces susceptibility to recall and reporting biases compared to  
290 most previous studies.<sup>3,4</sup> Accelerometers captured a wide range of daily behaviours, including both  
291 sedentary and physically active activities, as well as step count. Further, we processed the  
292 accelerometer data using open-source methods.<sup>34</sup> Our sample included a wide age-range (43-78

293 years at accelerometer wear) of participants, making the cohort mature for analysing more  
294 common adult-onset cancers.<sup>19,35</sup> Our results add to the limited literature on how physical activity  
295 impacts cancer risk across different cancer sites. We also employed compositional data analyses  
296 to model associations for 24-hour behaviours, rather than just individual behaviour risks. In  
297 addition, we controlled for key cancer risk factors and conducted extensive sensitivity analysis to  
298 examine major threats to the validity of our findings.

299 This study also had several limitations. The UK Biobank cohort includes middle to early late-aged  
300 individuals, potentially leading to underrepresentation of cancers with onset at more advanced  
301 ages. Secondly, the study is observational, and we cannot exclude the possibility of unmeasured  
302 and residual confounding. Reverse causation is also a possibility, as certain cancers may have been  
303 undiagnosed at the time of accelerometer wear and could have reduced daily PA. Nonetheless after  
304 removing the first two years of follow-up, we observed only minor attenuations. Future UK  
305 Biobank studies with additional follow-up will be required to investigate associations for less  
306 common cancers. Furthermore, we had accelerometer data from one period during middle-age;  
307 thus, we are also unable to draw conclusions about PA earlier in the life in relation to cancer risk.  
308 Finally, the study population drawn from the UK Biobank may not be representative of wider  
309 populations.<sup>36</sup> However, we believe that the etiological findings are still likely to have broader  
310 applicability.<sup>37</sup>

### 311 ***Conclusion***

312 Results from this prospective study suggest protective associations between engaging in higher  
313 levels of overall daily PA, reducing sedentary time in favour of engaging LIPA or MVPA, and



314 increasing daily step counts and cancer risk. These findings underscore the potential health benefits  
315 of incorporating lower intensity activities into daily life during middle age, alongside promoting  
316 higher intensity activities in public health initiatives focused on cancer prevention.

317 **ACKNOWLEDGEMENTS**

318 **Author Contributions:**

319 Shreves had full access to all the data in the study and takes responsibility for the integrity of the  
320 data and the accuracy of the data analysis.

321 Concept and design: Shreves, Travis, Matthews, Doherty.

322 Acquisition, analysis, or interpretation of data: Shreves, Small, Walmsley, Saint-Maurice, Papier,  
323 Travis, Matthews, Doherty.

324 Drafting of the manuscript: Shreves, Travis, Matthews, Doherty.

325 Critical revision of the manuscript for important intellectual content: All authors.

326 Statistical analysis: Shreves.

327 Obtained funding: Shreves, Travis, Matthews, Doherty.

328 Administrative, technical, or material support: Shreves, Chan, Walmsley, Doherty.

329 Supervision: Doherty, Matthews, Travis.

330 **Conflict of Interest Disclosures:**

331 Shreves, Moore, Gaitskell, Travis, and Matthews declare no competing interests.

332 Doherty is supported by Novo Nordisk. Doherty accepted consulting fees from the University of  
333 Wisconsin (NIH R01 grant) and Harvard University (NIH R01 grant). Doherty received support  
334 for presentations at the International Conference on Soft Computing in Data Science 2021, Korean  
335 Society of Cardiology 2020, and Oxford International Study Abroad programme 2023. Doherty  
336 received support to attend the 2023 CTSU Joint Annual Collaborators' Meeting, London, 2023 Big  
337 Model AI for Drug Design workshop, Abu Dhabi, 2023 Festival of Genomics, London, 2022  
338 Industry Symposium on Digital Biomarkers, EMBL-EBI, Cambridge, 2020 ELIXIR  
339 Bioinformatics Industry Forum, London, 2020 3rd NYU Biomedical and Biosystems Conference,  
340 Abu Dhabi, 2020 Academy of Medical Sciences, UK-Japan Symposium on Data-Driven Health.  
341 Doherty is a member of the 2021 Scientific advisory board EU IMI IDEA-FAST. Doherty received  
342 a donation from SwissRe to purchase equipment for accelerometer data collection in the China  
343 Kadoorie Biobank.

344 Doherty, Walmsley, and Chan have released accelerometer analysis software under an academic  
345 use license that could result in commercial entities paying license fees for their use.

346 **Funding/Support:**

347 Shreves, Saint-Maurice, Moore, and Matthews are supported by the National Institutes of Health's  
348 Intramural Research Program. Shreves is also supported by the National Institutes of Health's  
349 Oxford Cambridge Scholars Program. Walmsley is supported by HDR UK, an initiative funded  
350 by UK Research and Innovation, Department of Health and Social Care (England) and the  
351 devolved administrations. Papier is supported by Cancer Research UK (grant number  
352 C16077/A29186). Chan is supported Novo Nordisk. Doherty and Small are supported by the

353 Wellcome Trust (223100/Z/21/Z). Doherty is also supported by Novo Nordisk, Swiss Re, and the  
354 British Heart Foundation Centre of Research Excellence (grant number RE/18/3/34214). Travis is  
355 supported by Cancer Research UK (grant number C8221/A29017).

356 **Role of the Funder/Sponsor:**

357 The funders/sponsors had no role in the design of this study, the analysis and interpretation of the  
358 results, or drafting of the manuscript.

359 **REFERENCES**

- 360 1. Sung H, Ferlay J, Siegel R, et al. Global Cancer Statistics 2020: GLOBOCAN Estimates  
361 of Incidence and Mortality Worldwide for 36 Cancers in 185 Countries. *CA: A Cancer*  
362 *Journal for Clinicians*. 2021;71(3):209-249. doi:<https://doi.org/10.3322/caac.21660>
- 363 2. Islami F, Goding Sauer A, Miller KD, et al. Proportion and number of cancer cases and  
364 deaths attributable to potentially modifiable risk factors in the United States. *CA Cancer J*  
365 *Clin*. 2018;68(1):31-54. doi:10.3322/caac.21440
- 366 3. Shephard RJ. Limits to the measurement of habitual physical activity by questionnaires.  
367 *Br J Sports Med*. 2003;37(3):197-206; discussion 206. doi:10.1136/bjsm.37.3.197
- 368 4. Sallis JF, Saelens BE. Assessment of physical activity by self-report: status, limitations,  
369 and future directions. *Res Q Exerc Sport*. 2000;71 Suppl 2:1-14.  
370 doi:10.1080/02701367.2000.11082780
- 371 5. Tudor-Locke C, Leonardi C, Johnson WD, Katzmarzyk PT. Time Spent in Physical  
372 Activity and Sedentary Behaviors on the Working Day: The American Time Use Survey.  
373 *Journal of Occupational and Environmental Medicine*. 2011;53(12):1382.  
374 doi:10.1097/JOM.0b013e31823c1402
- 375 6. Matthews CE, Berrigan D, Fischer B, et al. Use of previous-day recalls of physical  
376 activity and sedentary behavior in epidemiologic studies: results from four instruments.  
377 *BMC Public Health*. 2019;19(Suppl 2):478. doi:10.1186/s12889-019-6763-8
- 378 7. Walmsley R, Chan S, Smith-Byrne K, et al. Reallocation of time between device-  
379 measured movement behaviours and risk of incident cardiovascular disease. *Br J Sports*  
380 *Med*. Published online September 6, 2021. doi:10.1136/bjsports-2021-104050
- 381 8. Guthold R, Stevens GA, Riley LM, Bull FC. Worldwide trends in insufficient physical  
382 activity from 2001 to 2016: a pooled analysis of 358 population-based surveys with 1.9  
383 million participants. *The Lancet Global Health*. 2018;6(10):e1077-e1086.  
384 doi:10.1016/S2214-109X(18)30357-7
- 385 9. Esliger DW, Tremblay MS. Physical activity and inactivity profiling: the next generation.  
386 *Can J Public Health*. 2007;98 Suppl 2:S195-207.
- 387 10. Dohrn IM, Kwak L, Oja P, Sjöström M, Hagströmer M. Replacing sedentary time with  
388 physical activity: a 15-year follow-up of mortality in a national cohort. *Clin Epidemiol*.  
389 2018;10:179-186. doi:10.2147/CLEP.S151613
- 390 11. del Pozo Cruz B, Ahmadi MN, Lee IM, Stamatakis E. Prospective Associations of Daily  
391 Step Counts and Intensity With Cancer and Cardiovascular Disease Incidence and  
392 Mortality and All-Cause Mortality. *JAMA Intern Med*. 2022;182(11):1139-1148.  
393 doi:10.1001/jamainternmed.2022.4000
- 394 12. Gilchrist SC, Howard VJ, Akinyemiju T, et al. Association of Sedentary Behavior With  
395 Cancer Mortality in Middle-aged and Older US Adults. *JAMA Oncology*. 2020;6(8):1210-  
396 1217. doi:10.1001/jamaoncol.2020.2045

- 397 13. Ensrud KE, Blackwell TL, Cauley JA, et al. Objective Measures of Activity Level and  
398 Mortality in Older Men. *Journal of the American Geriatrics Society*. 2014;62(11):2079-  
399 2087. doi:10.1111/jgs.13101
- 400 14. LaMonte MJ, Buchner DM, Rillamas-Sun E, et al. Accelerometer-Measured Physical  
401 Activity and Mortality in Women Aged 63 to 99. *Journal of the American Geriatrics*  
402 *Society*. 2018;66(5):886-894. doi:10.1111/jgs.15201
- 403 15. Guo W, Fensom GK, Reeves GK, Key TJ. Physical activity and breast cancer risk: results  
404 from the UK Biobank prospective cohort. *Br J Cancer*. 2020;122(5):726-732.  
405 doi:10.1038/s41416-019-0700-6
- 406 16. Hyde ET, LaCroix AZ, Evenson KR, et al. Accelerometer-measured physical activity and  
407 postmenopausal breast cancer incidence in the Women's Health Accelerometry  
408 Collaboration. *Cancer*. 2023;129(10):1579-1590. doi:10.1002/cncr.34699
- 409 17. Moore SC, Lee IM, Weiderpass E, et al. Association of Leisure-Time Physical Activity  
410 With Risk of 26 Types of Cancer in 1.44 Million Adults. *JAMA Intern Med*.  
411 2016;176(6):816-825. doi:10.1001/jamainternmed.2016.1548
- 412 18. Bassett DR, Toth LP, LaMunion SR, Crouter SE. Step Counting: A Review of  
413 Measurement Considerations and Health-Related Applications. *Sports Med*.  
414 2017;47(7):1303-1315. doi:10.1007/s40279-016-0663-1
- 415 19. UK Biobank Limited. UK Biobank Enable your research. UK Biobank. Published June  
416 24, 2021. Accessed August 31, 2022. <https://www.ukbiobank.ac.uk/enable-your-research>
- 417 20. Sudlow C, Gallacher J, Allen N, et al. UK Biobank: An Open Access Resource for  
418 Identifying the Causes of a Wide Range of Complex Diseases of Middle and Old Age.  
419 *PLOS Medicine*. 2015;12(3):e1001779. doi:10.1371/journal.pmed.1001779
- 420 21. Doherty A, Jackson D, Hammerla N, et al. Large Scale Population Assessment of Physical  
421 Activity Using Wrist Worn Accelerometers: The UK Biobank Study. *PLOS ONE*.  
422 2017;12(2):e0169649. doi:10.1371/journal.pone.0169649
- 423 22. Small SR, Chan S, Walmsley R, et al. Development and Validation of a Machine Learning  
424 Wrist-worn Step Detection Algorithm with Deployment in the UK Biobank. Published  
425 online February 22, 2023:2023.02.20.23285750. doi:10.1101/2023.02.20.23285750
- 426 23. Saint-Maurice PF, Troiano RP, Bassett DR Jr, et al. Association of Daily Step Count and  
427 Step Intensity With Mortality Among US Adults. *JAMA*. 2020;323(12):1151-1160.  
428 doi:10.1001/jama.2020.1382
- 429 24. Conroy MC, Lacey B, Bešević J, et al. UK Biobank: a globally important resource for  
430 cancer research. *Br J Cancer*. 2023;128(4):519-527. doi:10.1038/s41416-022-02053-5
- 431 25. 2011 UK Townsend Deprivation Scores - UK Data Service CKAN. Accessed June 28,  
432 2023. <https://statistics.ukdataservice.ac.uk/dataset/2011-uk-townsend-deprivation-scores>
- 433 26. von Elm E, Altman DG, Egger M, et al. Strengthening the Reporting of Observational  
434 Studies in Epidemiology (STROBE) statement: guidelines for reporting observational  
435 studies. *BMJ*. 2007;335(7624):806-808. doi:10.1136/bmj.39335.541782.AD

- 436 27. Cao Z, Xu C, Zhang P, Wang Y. Associations of sedentary time and physical activity with  
437 adverse health conditions: Outcome-wide analyses using isotemporal substitution model.  
438 *eClinicalMedicine*. 2022;48:101424. doi:10.1016/j.eclinm.2022.101424
- 439 28. Morris JS, Bradbury KE, Cross AJ, Gunter MJ, Murphy N. Physical activity, sedentary  
440 behaviour and colorectal cancer risk in the UK Biobank. *Br J Cancer*. 2018;118(6):920-  
441 929. doi:10.1038/bjc.2017.496
- 442 29. Friedenreich CM, Ryder-Burbidge C, McNeil J. Physical activity, obesity and sedentary  
443 behavior in cancer etiology: epidemiologic evidence and biologic mechanisms. *Molecular*  
444 *Oncology*. 2021;15(3):790-800. doi:10.1002/1878-0261.12772
- 445 30. Stamatakis E, Ahmadi MN, Friedenreich CM, et al. Vigorous Intermittent Lifestyle  
446 Physical Activity and Cancer Incidence Among Nonexercising Adults: The UK Biobank  
447 Accelerometry Study. *JAMA Oncology*. 2023;9(9):1255-1259.  
448 doi:10.1001/jamaoncol.2023.1830
- 449 31. Morris JN, Hardman AE. Walking to Health. *Sports Med*. 1997;23(5):306-332.  
450 doi:10.2165/00007256-199723050-00004
- 451 32. Ding D, Buskirk JV, Nguyen B, et al. Physical activity, diet quality and all-cause  
452 cardiovascular disease and cancer mortality: a prospective study of 346 627 UK Biobank  
453 participants. *Br J Sports Med*. 2022;56(20):1148-1156. doi:10.1136/bjsports-2021-105195
- 454 33. Parada H, McDonald E, Bellettiere J, Evenson KR, LaMonte MJ, LaCroix AZ.  
455 Associations of accelerometer-measured physical activity and physical activity-related  
456 cancer incidence in older women: results from the WHI OPACH Study. *Br J Cancer*.  
457 2020;122(9):1409-1416. doi:10.1038/s41416-020-0753-6
- 458 34. Bassett DR, Troiano RP, Mcclain JJ, Wolff DL. Accelerometer-based Physical Activity:  
459 Total Volume per Day and Standardized Measures. *Medicine & Science in Sports &*  
460 *Exercise*. 2015;47(4):833-838. doi:10.1249/MSS.0000000000000468
- 461 35. UK Biobank Limited. *UK Biobank Malignant Cancer Summary Report*.; 2022. Accessed  
462 December 9, 2021. <https://biobank.ndph.ox.ac.uk/~bbdatan/CancerSummaryReport.html>
- 463 36. Fry A, Littlejohns TJ, Sudlow C, et al. Comparison of Sociodemographic and Health-  
464 Related Characteristics of UK Biobank Participants With Those of the General  
465 Population. *Am J Epidemiol*. 2017;186(9):1026-1034. doi:10.1093/aje/kwx246
- 466 37. Batty GD, Gale CR, Kivimäki M, Deary IJ, Bell S. Comparison of risk factor associations  
467 in UK Biobank against representative, general population based studies with conventional  
468 response rates: prospective cohort study and individual participant meta-analysis. *BMJ*.  
469 2020;368:m131. doi:10.1136/bmj.m131
- 470

471 **TABLES AND FIGURES**

472 Table 1. Overall physical activity metrics by demographic characteristic in 86 556 UK Biobank  
473 participants.

474 Figure 1. Association of mean accelerometer-measured physical activity with risk of incident  
475 cancers in 86 556 UK Biobank participants.

476 Figure 2. Hazard ratios for balance between movement behaviours and incident physical-  
477 activity-related cancer risk associated in 86 556 UK Biobank participants.

478 Figure 3. Dose-response associations between daily step count and physical-activity-related  
479 cancer risk in 86 556 UK Biobank participants.

480 Table 2. Adjusted hazard ratios for peak 30-minute cadence and physical activity-related cancer  
481 risk in 86 556 UK Biobank participants.



Table 1. Overall physical activity metrics by demographic characteristic in 86 556 UK Biobank participants.

| Characteristic                          |                           | No. (%)      | Overall acceleration (mg) | Daily step count Median (IQR) | Peak 30 min cadence (steps/min) Median (IQR) |
|-----------------------------------------|---------------------------|--------------|---------------------------|-------------------------------|----------------------------------------------|
| <b>Overall</b>                          |                           | 86 556 (100) | 27.3 (22.7-32.7)          | 9 073 (6 834-11 686)          | 91 (81-101)                                  |
| Sex                                     | Female                    | 48 478 (56)  | 27.8 (23.2-33.1)          | 9 004 (6 812-11 560)          | 92 (82-102)                                  |
|                                         | Male                      | 38 078 (44)  | 26.7 (22.0-32.3)          | 9 152 (6 870-11 878)          | 90 (81-100)                                  |
| Age (years)                             | 40-49                     | 7 693 (9)    | 30.5 (25.6-36.7)          | 9 393 (7 126-12 070)          | 95 (85-105)                                  |
|                                         | 50-59                     | 25 659 (30)  | 29.1 (24.4-34.8)          | 9 204 (6 996-11 913)          | 93 (84-103)                                  |
|                                         | 60-69                     | 38 214 (44)  | 26.8 (22.3-31.9)          | 9 166 (6 922-11 772)          | 91 (81-100)                                  |
|                                         | 70-79                     | 14 990 (17)  | 24.3 (20.2-28.9)          | 8 430 (6 255-10 868)          | 87 (77-96)                                   |
| Ethnicity                               | Non-white                 | 2 726 (3)    | 28.5 (23.7-34.1)          | 8 720 (6 508-11 376)          | 91 (80-102)                                  |
|                                         | White                     | 83 830 (97)  | 27.3 (22.6-32.7)          | 9 084 (6 845-11 696)          | 91 (81-101)                                  |
| Quintiles of Townsend Deprivation Index | Least Deprived            | 43 574 (50)  | 27.4 (22.8-32.7)          | 9 080 (6 922-11 633)          | 90 (81-100)                                  |
|                                         | 2nd Quintile              | 19 542 (23)  | 27.3 (22.6-32.7)          | 9 078 (6 817-11 656)          | 91 (81-101)                                  |
|                                         | 3rd Quintile              | 12 151 (14)  | 27.4 (22.7-32.9)          | 9 164 (6 816-11 862)          | 93 (82-103)                                  |
|                                         | 4th Quintile              | 8 381 (10)   | 27.0 (22.1-32.7)          | 8 970 (6 586-11 802)          | 93 (82-103)                                  |
|                                         | Most Deprived             | 2 908 (3)    | 26.6 (21.6-32.4)          | 8 812 (6 293-11 664)          | 94 (81-104)                                  |
| Education qualifications                | School leaver             | 19 817 (23)  | 26.8 (22.0-32.2)          | 8 621 (6 428-11 229)          | 89 (79-99)                                   |
|                                         | Further education         | 28 993 (33)  | 27.3 (22.6-32.7)          | 8 883 (6 644-11 543)          | 90 (80-100)                                  |
|                                         | Higher education          | 37 746 (44)  | 27.6 (23.0-33.0)          | 9 434 (7 208-12 009)          | 93 (84-103)                                  |
| Smoking status                          | Never                     | 49 736 (57)  | 27.6 (23.0-33.1)          | 9 183 (6 980-11 762)          | 92 (82-102)                                  |
|                                         | Previous smoker           | 30 805 (36)  | 27.0 (22.4-32.4)          | 8 984 (6 720-11 671)          | 90 (80-100)                                  |
|                                         | Current, unknown cig/day  | 2 351 (3)    | 27.0 (22.3-32.2)          | 9 037 (6 766-11 730)          | 90 (80-100)                                  |
|                                         | Current, < 15 cig/day     | 899 (1)      | 25.6 (21.0-31.1)          | 8 160 (5 989-10 690)          | 86 (75-97)                                   |
|                                         | Current, ≥ 15 cig/day     | 2 765 (3)    | 25.3 (20.5-30.8)          | 8 108 (5 808-10 818)          | 87 (75-96)                                   |
| Alcohol consumption                     | Never                     | 4 859 (6)    | 26.4 (21.5-32.1)          | 8 530 (6 120-11 313)          | 89 (78-100)                                  |
|                                         | < 3 times/week            | 39 335 (45)  | 27.1 (22.4-32.5)          | 8 762 (6 554-11 379)          | 90 (80-100)                                  |
|                                         | 3+ times/week             | 42 362 (49)  | 27.6 (23.0-33.0)          | 9 411 (7 186-12 000)          | 92 (83-102)                                  |
| Body mass index, kg/m <sup>2</sup>      | ≤ 24.9 kg/m <sup>2</sup>  | 33 234 (38)  | 29.4 (24.6-35.2)          | 9 754 (7 548-12 401)          | 95 (85-105)                                  |
|                                         | 25-29.9 kg/m <sup>2</sup> | 36 206 (42)  | 26.9 (22.5-32.1)          | 9 094 (6 916-11 653)          | 91 (81-100)                                  |
|                                         | 30+ kg/m <sup>2</sup>     | 17 116 (20)  | 24.2 (20.0-29.1)          | 7 610 (5 564-10 060)          | 85 (74-95)                                   |
| Fruit and vegetable consumption         | < 3 servings/day          | 3 683 (4)    | 25.6 (20.7-30.8)          | 8 187 (5 930-10 973)          | 88 (78-99)                                   |
|                                         | 3-4.9 servings/day        | 14 167 (16)  | 26.7 (22.0-32.0)          | 8 781 (6 580-11 342)          | 90 (80-100)                                  |

| Characteristic                       |                       | No. (%)      | Overall acceleration (mg) | Daily step count Median (IQR) | Peak 30 min cadence (steps/min) Median (IQR) |
|--------------------------------------|-----------------------|--------------|---------------------------|-------------------------------|----------------------------------------------|
|                                      | 5-7.9 servings/day    | 36 127 (42)  | 27.3 (22.7-32.7)          | 9 117 (6 918-11 682)          | 91 (82-101)                                  |
|                                      | 8+ servings/day       | 31 857 (37)  | 27.9 (23.2-33.3)          | 9 232 (6 981-11 922)          | 92 (82-101)                                  |
|                                      | Missing               | 722 (1)      | 26.4 (21.2-32.6)          | 8 914 (6 127-11 825)          | 90 (79-100)                                  |
| Red and processed meat consumption   | Less than 1 time/week | 6 802 (8)    | 29.3 (24.3-35.1)          | 9 674 (7 256-12 397)          | 96 (85-106)                                  |
|                                      | 1-2.9 times/week      | 33 047 (38)  | 27.5 (22.9-32.9)          | 9 091 (6 906-11 682)          | 92 (82-102)                                  |
|                                      | 3-4.9 times/week      | 25 399 (29)  | 27.1 (22.5-32.5)          | 8 992 (6 768-11 582)          | 91 (81-100)                                  |
|                                      | 5+ times/week         | 20 927 (24)  | 26.6 (21.9-32.0)          | 8 964 (6 676-11 567)          | 90 (80-99)                                   |
|                                      | Missing               | 381 (0)      | 28.2 (21.5-34.1)          | 9 158 (6 190-12 077)          | 91 (79-101)                                  |
| Self-reported usual walking pace     | Brisk pace            | 41 087 (47)  | 29.0 (24.3-34.6)          | 9 630 (7 422-12 250)          | 94 (85-104)                                  |
|                                      | Steady average pace   | 41 381 (48)  | 26.2 (21.8-31.2)          | 8 737 (6 575-11 294)          | 89 (80-99)                                   |
|                                      | Slow pace             | 3 907 (5)    | 21.9 (17.6-26.8)          | 6 352 (4 150-8 870)           | 77 (64-89)                                   |
|                                      | None of the above     | 76 (0)       | 23.5 (18.5-29.3)          | 5 527 (2 945-9 778)           | 78 (54-87)                                   |
|                                      | Missing               | 105 (0)      | 18.9 (13.9-23.5)          | 3 397 (1 102-5 684)           | 56 (26-72)                                   |
| Self-rated overall health            | Excellent             | 19 332 (22)  | 29.2 (24.5-35.0)          | 9 765 (7 566-12 386)          | 95 (85-104)                                  |
|                                      | Good                  | 51 914 (60)  | 27.4 (22.8-32.6)          | 9 140 (6 946-11 727)          | 91 (82-101)                                  |
|                                      | Fair                  | 13 079 (15)  | 25.0 (20.6-30.2)          | 8 100 (5 885-10 650)          | 87 (76-97)                                   |
|                                      | Poor                  | 2 089 (2)    | 22.1 (17.6-27.2)          | 6 378 (4 064-8 983)           | 78 (64-90)                                   |
|                                      | Missing               | 142 (0)      | 23.3 (19.6-28.4)          | 7 928 (5 528-10 270)          | 85 (75-95)                                   |
| Wear season                          | Spring                | 19 875 (23)  | 27.7 (23.0-33.2)          | 9 207 (6 946-11 880)          | 92 (82-102)                                  |
|                                      | Summer                | 22 946 (27)  | 27.9 (23.1-33.4)          | 9 514 (7 208-12 186)          | 91 (82-101)                                  |
|                                      | Autumn                | 25 518 (29)  | 27.2 (22.7-32.6)          | 8 966 (6 794-11 522)          | 91 (81-101)                                  |
|                                      | Winter                | 18 217 (21)  | 26.3 (21.9-31.5)          | 8 518 (6 398-11 058)          | 90 (80-101)                                  |
| <b>Females<sup>a</sup></b>           |                       | 48 478 (100) | 27.8 (23.2-33.1)          | 9 004 (6 812-11 560)          | 92 (82-102)                                  |
| Number of live births                | 0                     | 10 373 (21)  | 27.9 (23.3-33.4)          | 9 060 (6 792-11 700)          | 94 (83-105)                                  |
|                                      | 1-2                   | 27 689 (57)  | 27.8 (23.3-33.1)          | 8 964 (6 796-11 490)          | 92 (82-101)                                  |
|                                      | 3+                    | 10 403 (21)  | 27.7 (23.1-32.9)          | 9 080 (6 863-11 606)          | 91 (81-101)                                  |
|                                      | Missing               | 13 (0)       | 29.6 (27.4-35.4)          | 9 048 (8 602-12 202)          | 91 (87-101)                                  |
| Had menopause                        | No                    | 13 166 (27)  | 30.0 (25.2-35.6)          | 9 304 (7 094-11 913)          | 95 (85-105)                                  |
|                                      | Yes                   | 28 028 (58)  | 27.1 (22.7-32.1)          | 9 022 (6 838-11 550)          | 91 (81-101)                                  |
|                                      | Missing/Not sure      | 7 284 (15)   | 26.8 (22.3-31.9)          | 8 406 (6 290-10 923)          | 89 (79-100)                                  |
| Hormone-replacement therapy ever use | No                    | 31 109 (64)  | 28.5 (24.0-34.0)          | 9 215 (7 016-11 805)          | 94 (83-103)                                  |
|                                      | Yes                   | 17 283 (36)  | 26.4 (22.1-31.3)          | 8 612 (6 473-11 102)          | 89 (79-99)                                   |

| <b>Characteristic</b>            |         | <b>No. (%)</b> | <b>Overall acceleration (mg)</b> | <b>Daily step count Median (IQR)</b> | <b>Peak 30 min cadence (steps/min) Median (IQR)</b> |
|----------------------------------|---------|----------------|----------------------------------|--------------------------------------|-----------------------------------------------------|
|                                  | Missing | 86 (0)         | 26.2 (21.6-32.1)                 | 7 854 (6 521-10 788)                 | 87 (79-100)                                         |
| Oral contraceptive pill ever use | No      | 7 027 (14)     | 26.9 (22.4-32.3)                 | 8 816 (6 685-11 295)                 | 91 (80-101)                                         |
|                                  | Yes     | 41 381 (85)    | 27.9 (23.4-33.2)                 | 9 037 (6 835-11 591)                 | 92 (82-102)                                         |
|                                  | Missing | 70 (0)         | 29.2 (23.8-33.0)                 | 8 848 (6 806-11 994)                 | 90 (83-104)                                         |

Activity metrics reported as median (interquartile range (IQR)). TDI = Townsend Deprivation Index, mg = milligravity, min=minute, cig = cigarettes, kg/m<sup>2</sup> = kilograms/meters<sup>2</sup>. <sup>a</sup>Among female participants, N=48 478.

Figure 1. Association of mean accelerometer-measured physical activity with risk of incident cancers in 86 556 UK Biobank participants.

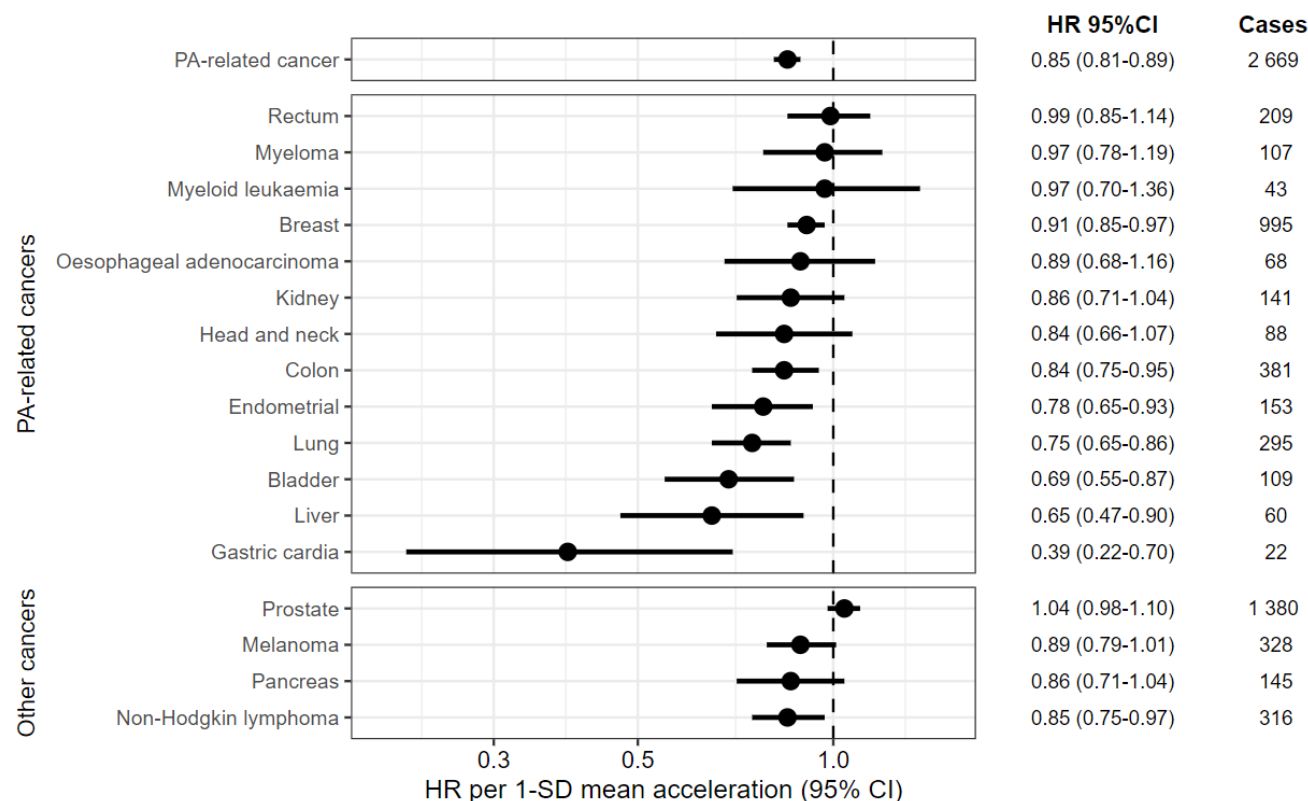

The standard deviation (SD) of total physical activity (PA) was 8.3 milligravity unit in the main analytical sample. Hazard ratios (HR) and 95% confidence intervals (CI) were estimated using a Cox proportional hazards regression model. Cases are incident cancers. PA-related cancer was defined as 13 site specific cancers (oesophageal adenocarcinoma, liver, lung, kidney, gastric cardia, endometrial, myeloid leukaemia, myeloma, colon, head and neck, rectal, bladder, and breast). Models used age as the underlying time variable and were adjusted for sex, ethnicity, smoking status, alcohol consumption, deprivation, and education. For breast cancer and endometrial cancer, models were adjusted for use of oral contraception, use of hormone replacement therapy, menopausal status, and parity. Participants were limited to males for prostate cancer (N=38 078), females for breast cancer (N=48 478), and females without a history of hysterectomy for endometrial cancer (N=41 010).

Figure 2. Hazard ratios for balance between movement behaviours and incident physical-activity-related cancer risk associated in 86 556 UK Biobank participants.

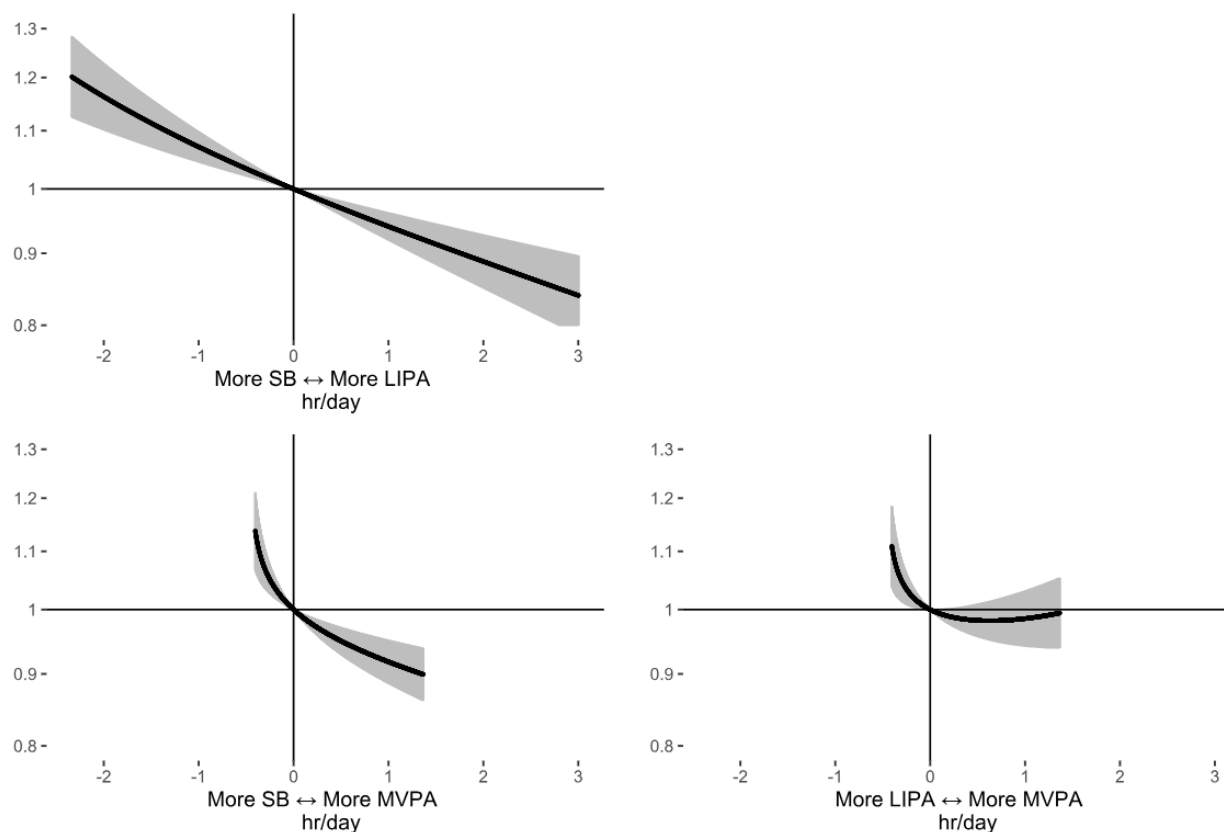

Hazard ratios are relative to the mean behaviour composition (8.1 hours/day sleep, 10.5 hours/day sedentary behaviour (SB), 4.9 hours/day light intensity physical activity behaviours (LIPA), 0.46 hours/day (27.4 minutes/day) moderate-vigorous intensity physical activity behaviours (MVPA)). Physical-activity-related cancer was defined as 13 site specific cancers (oesophageal adenocarcinoma, liver, lung, kidney, gastric cardia, endometrial, myeloid leukaemia, myeloma, colon, head and neck, rectal, bladder, and breast). Models used attained age as the underlying time variable and were adjusted for sex, ethnicity, smoking status, alcohol consumption, deprivation, and education. Models are based on 2 669 events in 86 556 participants. hr = hour.

Figure 3. Dose-response associations between daily step count and physical-activity-related cancer risk in 86 556 UK Biobank participants.

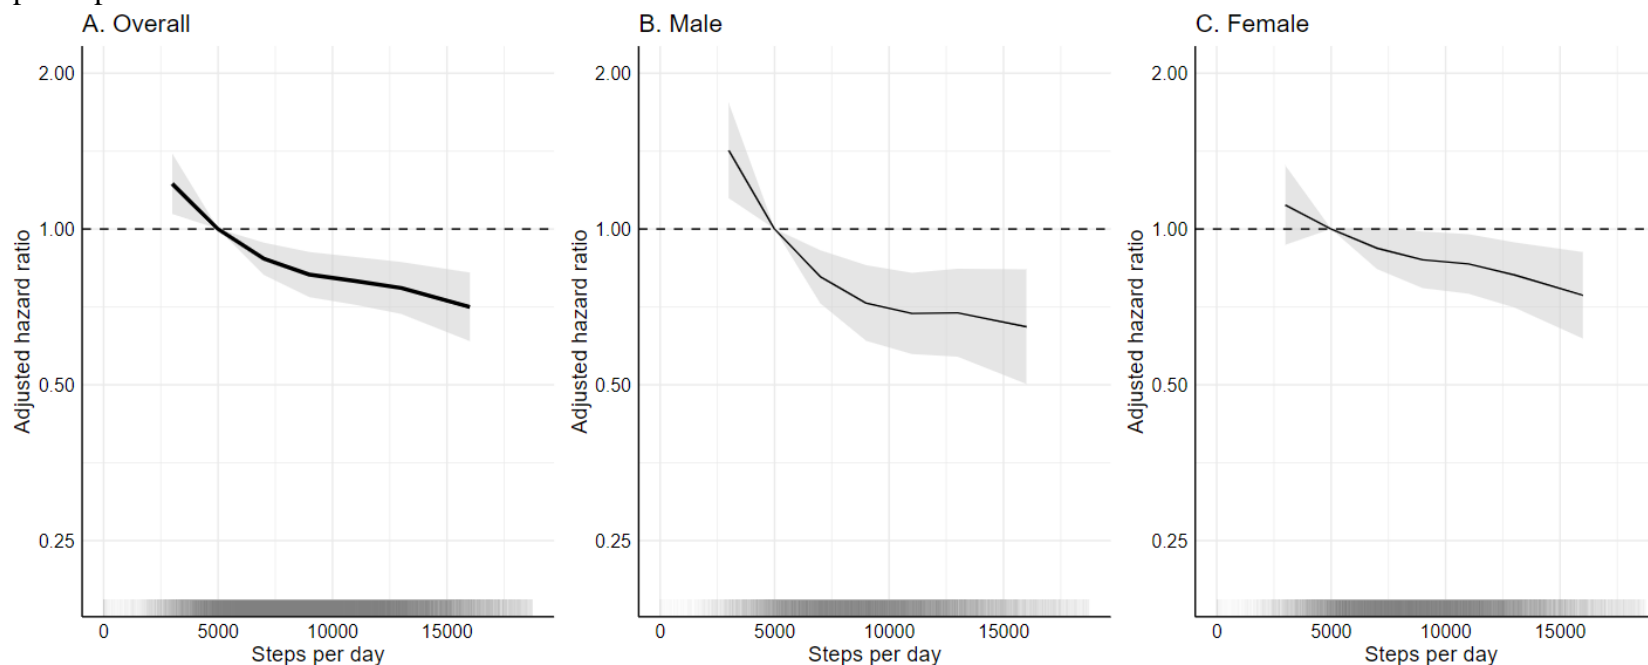

Estimated hazard ratios and 95% confidence intervals were computed using a Cox proportional hazards regression model with restricted cubic spline functions. Observations were trimmed at the 1% and 99% of the distribution and 3 knots were placed at the 5th, 50th, and 95<sup>th</sup> percentile for the exposures. The ~10<sup>th</sup> percentile was set as the referent group (5 000 steps). Physical-activity-related cancer was defined as 13 site specific cancers (oesophageal adenocarcinoma, liver, lung, kidney, gastric cardia, endometrial, myeloid leukaemia, myeloma, colon, head and neck, rectal, bladder, and breast). The male model was limited to 38 078 participants and the female model was limited to 48 478 participants. Models used attained age as the underlying time variable and were adjusted for ethnicity, smoking status, alcohol consumption, deprivation, and education. The overall model (A) was further adjusted for sex and the female model (C) was further adjusted for use of oral contraception, use of hormone replacement therapy, menopausal status, and parity. The shading on the lower axis represents sample clustering of daily step counts.

Table 2. Adjusted hazard ratios for peak 30-minute cadence and physical activity-related cancer risk in 86 556 UK Biobank participants.

|                                              | <b>Model 1</b>     | <b>Model 2</b>     |
|----------------------------------------------|--------------------|--------------------|
| <b>Peak 30-minute cadence (steps/minute)</b> | <b>HR (95% CI)</b> | <b>HR (95% CI)</b> |
| 60                                           | 1.14 (1.02 - 1.27) | 1.10 (0.98 - 1.23) |
| 70 (REF, ~10 <sup>th</sup> percentile)       | 1.00 (1.00 - 1.00) | 1.00 (1.00 - 1.00) |
| 80                                           | 0.88 (0.80 - 0.96) | 0.91 (0.83 - 1.00) |
| 90                                           | 0.82 (0.73 - 0.92) | 0.89 (0.78 - 1.01) |
| 100                                          | 0.77 (0.69 - 0.87) | 0.88 (0.76 - 1.02) |
| 110                                          | 0.74 (0.65 - 0.84) | 0.87 (0.73 - 1.04) |
| 120 (~95 <sup>th</sup> percentile)           | 0.72 (0.59 - 0.89) | 0.88 (0.69 - 1.14) |
| <i>P</i> value for linear trend              | <0.001             | 0.05               |

Estimated hazard ratios (HRs) and 95% confidence intervals (CIs) were computed using a Cox proportional hazards regression model with restricted cubic spline functions. Observations were trimmed at the 1% and 99% of the distribution and 3 knots were placed at the 5th, 50th, and 95<sup>th</sup> percentile for the exposures. The ~10<sup>th</sup> percentile was set as the referent (REF) group (70 steps per minute). Models used age as the underlying time variable and were adjusted for sex, ethnicity, smoking status, alcohol consumption, deprivation, and education. Model 2: Model 1 + median daily step count. Physical activity-related cancer was defined as 13 site specific cancers (oesophageal adenocarcinoma, liver, lung, kidney, gastric cardia, endometrial, myeloid leukaemia, myeloma, colon, head and neck, rectal, bladder, and breast).

## **eTABLES**

eTable 1: Definition of variables from the UK Biobank data.

eTable 2. Coding and number of site-specific cancer incident cases in UK Biobank participants.

eTable 3. Tabulation of number of incident primary events per cancer site in 86 556 UK Biobank participants.

eTable 4. Strengthening the Reporting of Observational Studies in Epidemiology (STROBE) statement.

eTable 5. Sequential model adjustments for total physical activity (milligravity units) and risk of incident cancer in 86 556 UK Biobank participants.

eTable 6. Sequential model adjustments for quintile of total physical activity (milligravity units), quintile of median daily step count, and risk of incident physical-activity-related cancer in 86 556 UK Biobank participants.

eTable 7. Changes in behaviour time and physical-activity-related cancer risk in 86 556 UK Biobank participants.

eTable 8. Sequential model adjustments for median daily step count and physical-activity-related cancer risk in 86 556 UK Biobank participants.

eTable 9. Sequential model adjustments for total physical activity (milligravity units) and risk of incident cancer in the UK Biobank among 38 078 male UK Biobank participants.

eTable 10. Sequential model adjustments for total physical activity (milligravity units) and risk of incident cancer in the UK Biobank among 48 478 female UK Biobank participants.

eTable 11. Sex-specific adjusted hazard ratios for median daily step count and physical-activity-related cancer risk in 38 078 male UK Biobank participants and 48 478 female UK Biobank participants.

eTable 12. Models for quintile of total physical activity (milligravity units), quintile of median daily step count, and risk of incident physical-activity-related cancer in UK Biobank participants who were never smokers (N=49 736).

eTable 13. Models for quintile of total physical activity (milligravity units), quintile of median daily step count, and risk of incident physical-activity-related cancer in 86 556 UK Biobank participants before and after removing the first two years of follow-up (N=83 435).

## **eFIGURES**

eFigure 1. Participant flow diagram for the analysis of daily physical activity and step count measured by accelerometers in UK Biobank participants.

eFigure 2. Hazard Ratios reallocating time to a given movement behaviour from all other behaviours proportionally and incident physical-activity-related cancer in 86 556 UK Biobank participants.

eFigure 3. Hazard ratios for all behaviour pairs and incident physical-activity-related cancer risk for estimated using a multivariable-adjusted Cox regression model in 86 556 UK Biobank participants before (blue) and after adjusting for body mass index as a sensitivity analysis.

eFigure 4. Hazard ratios for all behaviour pairs and incident physical-activity-related cancer risk for estimated using a multivariable-adjusted Cox regression model in 86 556 UK Biobank participants before (blue) and after adjusting for dietary factors as a sensitivity analysis.

eFigure 5. Hazard ratios for all behaviour pairs and incident physical-activity-related cancer risk for estimated using a multivariable-adjusted Cox regression model among 48 478 female participants (blue) and 38 078 male participants (red).

eFigure 6. Hazard ratios for all behaviour pairs and incident physical-activity-related cancer risk for estimated using a multivariable-adjusted Cox regression model in 86 556 UK Biobank participants before (blue) and after restricting to never smokers (red, N=49 736).

eFigure 7. Hazard ratios for all behaviour pairs and incident physical-activity-related cancer risk for estimated using a multivariable-adjusted Cox regression model in 86 556 UK Biobank participants before (blue) and after removing the first two years of follow-up (red, N=83 435).



**eTable 1. Definition of variables from the UK Biobank data.**

| Characteristic                              | Source                          | Notes                                                                                                                                                                                                                                 | UK Biobank field    | Coding Notes |
|---------------------------------------------|---------------------------------|---------------------------------------------------------------------------------------------------------------------------------------------------------------------------------------------------------------------------------------|---------------------|--------------|
| <b>OUTCOME</b>                              |                                 |                                                                                                                                                                                                                                       |                     |              |
| Age at first cancer event                   | Cancer Registry, Death Registry | First ICD-10 code in cancer registry or death registry data. Full list of ICD-10 and ICD-O-3 codes are described in detail in eTable 1.                                                                                               | Derived from 100092 |              |
| Age at loss-to-follow up                    | Death Registry                  |                                                                                                                                                                                                                                       | Derived from 100093 |              |
| <b>EXPOSURE</b>                             |                                 |                                                                                                                                                                                                                                       |                     |              |
| Total physical activity                     | Accelerometry                   | Derived using the Biobank Accelerometer Analysis Tool, "accelerometer", version 7.1.0. Details: <a href="https://github.com/OxWearables/biobankAccelerometerAnalysis">https://github.com/OxWearables/biobankAccelerometerAnalysis</a> |                     |              |
| Step count                                  | Accelerometry                   | Derived using the "stepcount" tool, version 3.1.1. Details can be found at: <a href="https://github.com/OxWearables/stepcount">https://github.com/OxWearables/stepcount</a>                                                           |                     |              |
| Peak 30 second cadence                      | Accelerometry                   | Derived using the "stepcount" tool, version 3.1.1. Details can be found at: <a href="https://github.com/OxWearables/stepcount">https://github.com/OxWearables/stepcount</a>                                                           |                     |              |
| Sleep                                       | Accelerometry                   | Derived using the Biobank Accelerometer Analysis Tool, "accelerometer", version 7.1.0. Details: <a href="https://github.com/OxWearables/biobankAccelerometerAnalysis">https://github.com/OxWearables/biobankAccelerometerAnalysis</a> |                     |              |
| Sedentary behaviour                         | Accelerometry                   | Derived using the Biobank Accelerometer Analysis Tool, "accelerometer", version 7.1.0. Details: <a href="https://github.com/OxWearables/biobankAccelerometerAnalysis">https://github.com/OxWearables/biobankAccelerometerAnalysis</a> |                     |              |
| Light intensity physical activity behaviour | Accelerometry                   | Derived using the Biobank Accelerometer Analysis Tool, "accelerometer", version 7.1.0. Details: <a href="https://github.com/OxWearables/biobankAccelerometerAnalysis">https://github.com/OxWearables/biobankAccelerometerAnalysis</a> |                     |              |

| Characteristic                                           | Source          | Notes                                                                                                                                                                                                                                 | UK Biobank field           | Coding Notes                                                                                                                                             |
|----------------------------------------------------------|-----------------|---------------------------------------------------------------------------------------------------------------------------------------------------------------------------------------------------------------------------------------|----------------------------|----------------------------------------------------------------------------------------------------------------------------------------------------------|
| Moderate-vigorous intensity physical activity behaviours | Accelerometry   | Derived using the Biobank Accelerometer Analysis Tool, "accelerometer", version 7.1.0. Details: <a href="https://github.com/OxWearables/biobankAccelerometerAnalysis">https://github.com/OxWearables/biobankAccelerometerAnalysis</a> |                            |                                                                                                                                                          |
| <b>EXCLUSION VARIABLES – MAIN ANALYSIS</b>               |                 |                                                                                                                                                                                                                                       |                            |                                                                                                                                                          |
| Prior incident cancer                                    | Cancer Registry | Cancer-related ICD-10 codes in cancer registry data prior to accelerometry wear date.                                                                                                                                                 | Derived from 100092        |                                                                                                                                                          |
| <b>ADJUSTMENT VARIABLES – MAIN ANALYSIS</b>              |                 |                                                                                                                                                                                                                                       |                            |                                                                                                                                                          |
| Age                                                      | Baseline        | Attained age was the underlying timescale in survival analyses; participants entered the study at the end of accelerometer wear.                                                                                                      | Derived from 90011, 34, 52 |                                                                                                                                                          |
| Sex                                                      | Baseline        |                                                                                                                                                                                                                                       | 31                         | Male, Female                                                                                                                                             |
| Ethnicity                                                | Baseline        |                                                                                                                                                                                                                                       | Derived from 21000         | White, non-White                                                                                                                                         |
| Smoking status                                           | Baseline        |                                                                                                                                                                                                                                       | Derived from 20116, 3456   | Never, previous, current unknown cigarettes/day, current < 15 cigarettes per day, or current ≥ 15 cigarettes per day                                     |
| Alcohol consumption                                      | Baseline        |                                                                                                                                                                                                                                       | Derived from 1558          | Never, <3 times per week, or ≥ 3 times per week                                                                                                          |
| Education                                                | Baseline        |                                                                                                                                                                                                                                       | Derived from 6138          | School leaver, Further education (education beyond O-Levels/CSEs, excluding college/ university degree) and Higher education (college/university degree) |
| Townsend Deprivation Index                               | Baseline        | Townsend Deprivation Index of address at time of UKB baseline assessment.                                                                                                                                                             | Derived from 189           | Divided by quintile of the UK population based on the 2011 UK census <sup>a</sup>                                                                        |
| Parity                                                   | Baseline        | Among females only                                                                                                                                                                                                                    | Derived from 2734          | 0, 1-2, 3+, Missing                                                                                                                                      |
| Use of hormone replacement therapy                       | Baseline        | Among females only                                                                                                                                                                                                                    | Derived from 2814          | No, Yes, Missing                                                                                                                                         |

| Characteristic                                     | Source   | Notes              | UK Biobank field                    | Coding Notes                                                                                                                                                                                       |
|----------------------------------------------------|----------|--------------------|-------------------------------------|----------------------------------------------------------------------------------------------------------------------------------------------------------------------------------------------------|
| Use of oral contraceptives pill                    | Baseline | Among females only | Derived from 2784                   | No, Yes, Missing                                                                                                                                                                                   |
| Menopausal status                                  | Baseline | Among females only | Derived from 2724                   | No, Yes, Not sure or Missing                                                                                                                                                                       |
| <b>ADJUSTMENT VARIABLES – SENSITIVITY ANALYSIS</b> |          |                    |                                     |                                                                                                                                                                                                    |
| Body mass index                                    | Baseline |                    | Derived from 21001                  | For descriptive analyses: Underweight/Normal weight ( $\leq 24.9$ kilograms/meters <sup>2</sup> ), Overweight (25-29.9 kilograms/meters <sup>2</sup> ), Obese (30+ kilograms/meters <sup>2</sup> ) |
| Frequency of red and processed meat consumption    | Baseline |                    | Derived from 1369, 1379, 1389, 1349 | <1, 1–2.9, 3–4.9, 5+ times/week, Missing                                                                                                                                                           |
| Frequency of fresh fruit and vegetable consumption | Baseline |                    | Derived from 1289, 1299, 1309       | <3, 3–4.9, 5–7.9, 8+ servings/day, Missing                                                                                                                                                         |
| <b>DESCRIPTIVE VARIABLES – DESCRIPTIVE TABLES</b>  |          |                    |                                     |                                                                                                                                                                                                    |
| Self-reported usual Walking pace                   |          |                    | 924                                 | Slow pace, Steady average pace, Brisk pace, None of the above                                                                                                                                      |
| Self-rated overall health                          |          |                    | 2178                                | Excellent, Good, Fair, Poor                                                                                                                                                                        |
| Wear season                                        |          |                    | Derived from 90001                  | Winter, Spring, Summer, Autumn                                                                                                                                                                     |

<sup>a</sup> Deprivation based on the 2011 UK census (2011 UK Townsend Deprivation Scores - UK Data Service CKAN. Accessed June 28, 2023. <https://statistics.ukdataservice.ac.uk/dataset/2011-uk-townsend-deprivation-scores>)

**eTable 2. Coding and number of site-specific cancer incident cases in UK Biobank participants.**

| Cancer site                              | Cancer registry ICD-10<br>(if applicable, ICD-O-3) <sup>e</sup>                                                                                        | Death registry ICD-10 codes                                                                                                                             |
|------------------------------------------|--------------------------------------------------------------------------------------------------------------------------------------------------------|---------------------------------------------------------------------------------------------------------------------------------------------------------|
| <b>Physical-activity-related cancers</b> |                                                                                                                                                        |                                                                                                                                                         |
| Bladder                                  | C670-679                                                                                                                                               | C670-679                                                                                                                                                |
| Breast <sup>a</sup>                      | C500-509                                                                                                                                               | C500-509                                                                                                                                                |
| Colon                                    | C180-189                                                                                                                                               | C180-189                                                                                                                                                |
| Endometrial <sup>b</sup>                 | C540-549 and C559                                                                                                                                      | C540-549 and C559                                                                                                                                       |
| Gastric cardia                           | C160                                                                                                                                                   | C160                                                                                                                                                    |
| Head and neck                            | C000-009 C019-029, C079-C089, C040-049,<br>C030-039, C050-059, C060-069, C110-119<br>C090-099, C100-109, C129, C130-139, C140,<br>C142, C148, C320-329 | C000-009 C019-029, C079-C089, C040-<br>049, C030-039, C050-059, C060-069,<br>C110-119 C090-099, C100-109, C129,<br>C130-139, C140, C142, C148, C320-329 |
| Kidney                                   | C640-659                                                                                                                                               | C640-659                                                                                                                                                |
| Liver                                    | C220-229                                                                                                                                               | C220-229                                                                                                                                                |
| Lung                                     | C340-349                                                                                                                                               | C340-349                                                                                                                                                |
| Myeloid leukaemia                        | Any histology of 9840, 9861, 9865-9867, 9869,<br>9871-9874, 9895-9897, 9898, 9910-9911, 9920,<br>9891, 9863, 9875-9876, 9945-9946, 9860, 9930          | Histology based                                                                                                                                         |
| Myeloma                                  | C880-889, C900-909 <sup>f</sup>                                                                                                                        | C880-889, C900-909                                                                                                                                      |
| Oesophageal adenocarcinoma               | C150-159 & histologies: 8140, 8142, 8144, 8261,<br>8310, 8480, 8481, 8570                                                                              | Histology based                                                                                                                                         |
| Rectal                                   | C190-209                                                                                                                                               | C190-209                                                                                                                                                |
| <b>Other site-specific cancers</b>       |                                                                                                                                                        |                                                                                                                                                         |
| Anal                                     | C210-219                                                                                                                                               | C210-219                                                                                                                                                |
| Brain                                    | C710-719                                                                                                                                               | C710-719                                                                                                                                                |
| Cervix <sup>a</sup>                      | C530-539                                                                                                                                               | C530-539                                                                                                                                                |
| Gallbladder                              | C230-239                                                                                                                                               | C230-239                                                                                                                                                |
| Gastric non-cardia                       | C161-169                                                                                                                                               | C161-169                                                                                                                                                |
| Hodgkin lymphoma                         | C810-819 <sup>f</sup>                                                                                                                                  | C810-819                                                                                                                                                |
| Melanoma skin                            | C430-439, only histologies: 8720-8790                                                                                                                  | C430-439                                                                                                                                                |

| <b>Cancer site</b>                  | <b>Cancer registry ICD-10<br/>(if applicable, ICD-O-3)<sup>e</sup></b>                          | <b>Death registry ICD-10 codes</b>                                                              |
|-------------------------------------|-------------------------------------------------------------------------------------------------|-------------------------------------------------------------------------------------------------|
| Non-Hodgkin lymphoma                | C820-869, C911, or any histologies of 9823, 9670                                                | C820-869, C911                                                                                  |
| Chronic lymphocytic leukaemia       | C911                                                                                            | C911                                                                                            |
| Other leukaemia                     | C910-959, excluding cases classified as Myeloid leukaemia and non-Hodgkin lymphoma <sup>f</sup> | C910-959, excluding cases classified as Myeloid leukaemia and non-Hodgkin lymphoma <sup>f</sup> |
| Oesophageal squamous cell carcinoma | C150-159, only histologies: 8041,8070,8071,8072,8074                                            | Histology based                                                                                 |
| Ovary <sup>c</sup>                  | C560-569                                                                                        | C560-569                                                                                        |
| Pancreas                            | C250-259                                                                                        | C250-259                                                                                        |
| Prostate <sup>d</sup>               | C610-619                                                                                        | C610-619                                                                                        |
| Small intestine                     | C170-179                                                                                        | C170-179                                                                                        |
| Thyroid                             | C730-739                                                                                        | C730-739                                                                                        |

<sup>a</sup>Among females, <sup>b</sup>Among females with no history of hysterectomy, <sup>c</sup>Among females with no history of bilateral oophorectomy, <sup>d</sup>Among males.

<sup>e</sup>Unless stated, definitions exclude ICD-O-3 histology codes 9050-9055, 9140, 9590-9992 cell types, which includes Kaposi sarcoma (9140), mesothelioma (9050–9055), lymphomas, leukaemias, myelomas, lymphoreticular, and immunoproliferative diseases (9050-9055, 9140, 9590-9992).

<sup>f</sup>Unless stated, definitions exclude ICD-O-3 histology codes 9050-9055 and 9140, which includes Kaposi sarcoma (9140) and mesothelioma (9050–9055).

**eTable 3. Tabulation of number of incident primary events per cancer site in 86 556 UK Biobank participants.**

|                                          | <b>Overall</b>  | <b>Male</b>     | <b>Female</b>   |
|------------------------------------------|-----------------|-----------------|-----------------|
| <b>Cancer type</b>                       | <b>N=86 556</b> | <b>N=38 078</b> | <b>N=48 478</b> |
| <b>Physical-activity-related cancers</b> | 2 669           | 898             | 1 771           |
| Bladder                                  | 109             | 86              | 23              |
| Breast <sup>a</sup>                      | 995             | NA              | 995             |
| Colon                                    | 381             | 207             | 174             |
| Endometrial <sup>b</sup>                 | 153             | NA              | 153             |
| Gastric cardia                           | 22              | 18              | <5 <sup>a</sup> |
| Head and neck                            | 88              | 68              | 20              |
| Kidney                                   | 141             | 83              | 58              |
| Liver                                    | 60              | 34              | 26              |
| Lung                                     | 295             | 148             | 147             |
| Myeloid leukaemia                        | 43              | 18              | 25              |
| Myeloma                                  | 107             | 61              | 46              |
| Oesophageal adenocarcinoma               | 68              | 56              | 12              |
| Rectal                                   | 209             | 121             | 88              |
| <b>Other site-specific cancers</b>       |                 |                 |                 |
| Anal                                     | 26              | 6               | 20              |
| Brain                                    | 79              | 42              | 37              |
| Cervix <sup>a</sup>                      | 12              | NA              | 12              |
| Gallbladder                              | 10              | 6               | <5 <sup>a</sup> |
| Gastric non-cardia                       | 40              | 25              | 15              |
| Hodgkin lymphoma                         | 12              | 7               | 5               |
| Melanoma skin                            | 328             | 181             | 147             |
| Non-Hodgkin lymphoma                     | 316             | 176             | 140             |
| Chronic lymphocytic leukaemia            | 76              | 49              | 27              |
| Oesophageal squamous cell carcinoma      | 29              | 12              | 17              |
| Other leukaemia                          | 27              | 18              | 9               |
| Ovary <sup>c</sup>                       | 66              | NA              | 66              |
| Pancreas                                 | 145             | 80              | 65              |
| Prostate <sup>d</sup>                    | 1380            | 1380            | NA              |
| Small intestine                          | 30              | 14              | 16              |
| Thyroid                                  | 43              | 15              | 28              |

Physical-activity-related cancer was defined as 13 site specific cancers (oesophageal adenocarcinoma, liver, lung, kidney, gastric cardia, endometrial, myeloid leukaemia, myeloma, colon, head and neck, rectal, bladder, and breast). <sup>a</sup>Among females, <sup>b</sup>Among females with no history of hysterectomy, <sup>c</sup>Among males, <sup>d</sup>Among females with no history of bilateral oophorectomy. <sup>e</sup>UK Biobank policy states that tables should have a minimum number of 5 reported participants within a cell.

**eTable 4. Strengthening the Reporting of Observational Studies in Epidemiology (STROBE) statement.**

|                              | Item No. | Recommendation                                                                                                                                                                                                                                                                                                                                                                                                                                                         | Page No.                |
|------------------------------|----------|------------------------------------------------------------------------------------------------------------------------------------------------------------------------------------------------------------------------------------------------------------------------------------------------------------------------------------------------------------------------------------------------------------------------------------------------------------------------|-------------------------|
| Title and abstract           | 1        | (a) Indicate the study's design with a commonly used term in the title or the abstract                                                                                                                                                                                                                                                                                                                                                                                 | 1, 3                    |
|                              |          | (b) Provide in the abstract an informative and balanced summary of what was done and what was found                                                                                                                                                                                                                                                                                                                                                                    | 3                       |
| <b>Introduction</b>          |          |                                                                                                                                                                                                                                                                                                                                                                                                                                                                        |                         |
| Background/rationale         | 2        | Explain the scientific background and rationale for the investigation being reported                                                                                                                                                                                                                                                                                                                                                                                   | 5-6                     |
| Objectives                   | 3        | State specific objectives, including any prespecified hypotheses                                                                                                                                                                                                                                                                                                                                                                                                       | 5-6                     |
| <b>Methods</b>               |          |                                                                                                                                                                                                                                                                                                                                                                                                                                                                        |                         |
| Study design                 | 4        | Present key elements of study design early in the paper                                                                                                                                                                                                                                                                                                                                                                                                                | 5-9                     |
| Setting                      | 5        | Describe the setting, locations, and relevant dates, including periods of recruitment, exposure, follow-up, and data collection                                                                                                                                                                                                                                                                                                                                        | 6-7                     |
| Participants                 | 6        | (a) <i>Cohort study</i> —Give the eligibility criteria, and the sources and methods of selection of participants. Describe methods of follow-up<br><i>Case-control study</i> —Give the eligibility criteria, and the sources and methods of case ascertainment and control selection. Give the rationale for the choice of cases and controls<br><i>Cross-sectional study</i> —Give the eligibility criteria, and the sources and methods of selection of participants | 6-8                     |
|                              |          | (b) <i>Cohort study</i> —For matched studies, give matching criteria and number of exposed and unexposed<br><i>Case-control study</i> —For matched studies, give matching criteria and the number of controls per case                                                                                                                                                                                                                                                 | NA                      |
| Variables                    | 7        | Clearly define all outcomes, exposures, predictors, potential confounders, and effect modifiers. Give diagnostic criteria, if applicable                                                                                                                                                                                                                                                                                                                               | 6-9, eTable 1, eTable 2 |
| Data sources/<br>measurement | 8*       | For each variable of interest, give sources of data and details of methods of assessment (measurement). Describe comparability of assessment methods if there is more than one group                                                                                                                                                                                                                                                                                   | 6-9, eTable 1           |

|                        | Item No. | Recommendation                                                                                                                                                                                                                                                                                            | Page No.                |
|------------------------|----------|-----------------------------------------------------------------------------------------------------------------------------------------------------------------------------------------------------------------------------------------------------------------------------------------------------------|-------------------------|
| Bias                   | 9        | Describe any efforts to address potential sources of bias                                                                                                                                                                                                                                                 | 9                       |
| Study size             | 10       | Explain how the study size was arrived at                                                                                                                                                                                                                                                                 | 6-8, eFigure 1          |
| Quantitative variables | 11       | Explain how quantitative variables were handled in the analyses. If applicable, describe which groupings were chosen and why                                                                                                                                                                              | 6-9, eTable 1           |
| Statistical methods    | 12       | (a) Describe all statistical methods, including those used to control for confounding                                                                                                                                                                                                                     | 8-10                    |
|                        |          | (b) Describe any methods used to examine subgroups and interactions                                                                                                                                                                                                                                       | 9                       |
|                        |          | (c) Explain how missing data were addressed                                                                                                                                                                                                                                                               | 6-9, eTable1, eFigure 1 |
|                        |          | (d) <i>Cohort study</i> —If applicable, explain how loss to follow-up was addressed<br><i>Case-control study</i> —If applicable, explain how matching of cases and controls was addressed<br><i>Cross-sectional study</i> —If applicable, describe analytical methods taking account of sampling strategy | 8, eFigure 1            |
|                        |          | (e) Describe any sensitivity analyses                                                                                                                                                                                                                                                                     | 9                       |
| Participants           | 13*      | (a) Report numbers of individuals at each stage of study—eg numbers potentially eligible, examined for eligibility, confirmed eligible, included in the study, completing follow-up, and analysed                                                                                                         | eFigure 1               |
|                        |          | (b) Give reasons for non-participation at each stage                                                                                                                                                                                                                                                      | eFigure 1               |
|                        |          | (c) Consider use of a flow diagram                                                                                                                                                                                                                                                                        | eFigure 1               |
| Descriptive data       | 14*      | (a) Give characteristics of study participants (eg demographic, clinical, social) and information on exposures and potential confounders                                                                                                                                                                  | Table 1                 |
|                        |          | (b) Indicate number of participants with missing data for each variable of interest                                                                                                                                                                                                                       | Table 1                 |
|                        |          | (c) <i>Cohort study</i> —Summarise follow-up time (eg, average and total amount)                                                                                                                                                                                                                          | 10                      |
| Outcome data           | 15*      | <i>Cohort study</i> —Report numbers of outcome events or summary measures over time                                                                                                                                                                                                                       | 10, eTable 3            |
|                        |          | <i>Case-control study</i> —Report numbers in each exposure category, or summary measures of exposure                                                                                                                                                                                                      | NA                      |
|                        |          | <i>Cross-sectional study</i> —Report numbers of outcome events or summary measures                                                                                                                                                                                                                        | NA                      |



|                          | <b>Item No.</b> | <b>Recommendation</b>                                                                                                                                                                                        | <b>Page No.</b>                |
|--------------------------|-----------------|--------------------------------------------------------------------------------------------------------------------------------------------------------------------------------------------------------------|--------------------------------|
| Main results             | 16              | (a) Give unadjusted estimates and, if applicable, confounder-adjusted estimates and their precision (eg, 95% confidence interval). Make clear which confounders were adjusted for and why they were included | Table 2, eTables 5-13.         |
|                          |                 | (b) Report category boundaries when continuous variables were categorized                                                                                                                                    | eTable 6, eTable 12, eTable 13 |
|                          |                 | (c) If relevant, consider translating estimates of relative risk into absolute risk for a meaningful time period                                                                                             | NA                             |
| Other analyses           | 17              | Report other analyses done—eg analyses of subgroups and interactions, and sensitivity analyses                                                                                                               | 12-13                          |
| <b>Discussion</b>        |                 |                                                                                                                                                                                                              |                                |
| Key results              | 18              | Summarise key results with reference to study objectives                                                                                                                                                     | 10-12                          |
| Limitations              | 19              | Discuss limitations of the study, taking into account sources of potential bias or imprecision. Discuss both direction and magnitude of any potential bias                                                   | 15-16                          |
| Interpretation           | 20              | Give a cautious overall interpretation of results considering objectives, limitations, multiplicity of analyses, results from similar studies, and other relevant evidence                                   | 16                             |
| Generalisability         | 21              | Discuss the generalisability (external validity) of the study results                                                                                                                                        | 15-16                          |
| <b>Other information</b> |                 |                                                                                                                                                                                                              |                                |
| Funding                  | 22              | Give the source of funding and the role of the funders for the present study and, if applicable, for the original study on which the present article is based                                                | 19-20                          |

**eTable 5. Sequential model adjustments for total physical activity (milligravity units) and risk of incident cancer in 86 556 UK Biobank participants.**

|                                  |                   | <b>Model 1</b>              | <b>Model 2</b>              | <b>Model 3</b>              |
|----------------------------------|-------------------|-----------------------------|-----------------------------|-----------------------------|
| <b>Cancer type</b>               | <b>Case count</b> | <b>HR per 1 SD (95% CI)</b> | <b>HR per 1 SD (95% CI)</b> | <b>HR per 1 SD (95% CI)</b> |
| Physical-activity-related cancer | 2 669             | 0.85 (0.81-0.88)            | 0.85 (0.81-0.89)            | 0.88 (0.84-0.92)            |
| Bladder                          | 109               | 0.63 (0.50-0.80)            | 0.69 (0.55-0.87)            | 0.71 (0.56-0.90)            |
| Breast                           | 995               | 0.90 (0.85-0.97)            | 0.91 (0.85-0.97)            | 0.91 (0.85-0.98)            |
| Colon                            | 381               | 0.84 (0.75-0.94)            | 0.84 (0.75-0.95)            | 0.88 (0.78-0.99)            |
| Endometrial                      | 153               | 0.76 (0.63-0.91)            | 0.78 (0.65-0.93)            | 0.89 (0.74-1.07)            |
| Gastric cardia                   | 22                | 0.31 (0.17-0.56)            | 0.39 (0.22-0.70)            | 0.47 (0.25-0.85)            |
| Head and neck                    | 88                | 0.75 (0.59-0.97)            | 0.84 (0.66-1.07)            | 0.82 (0.64-1.04)            |
| Kidney                           | 141               | 0.80 (0.66-0.98)            | 0.86 (0.71-1.04)            | 0.89 (0.73-1.08)            |
| Liver                            | 60                | 0.62 (0.45-0.86)            | 0.65 (0.47-0.90)            | 0.72 (0.52-1.00)            |
| Lung                             | 295               | 0.64 (0.55-0.74)            | 0.75 (0.65-0.86)            | 0.77 (0.66-0.89)            |
| Myeloid Leukaemia                | 43                | 0.95 (0.68-1.33)            | 0.97 (0.78-1.19)            | 1.00 (0.81-1.24)            |
| Myeloma                          | 107               | 0.94 (0.76-1.16)            | 0.97 (0.70-1.36)            | 1.03 (0.74-1.45)            |
| Oesophageal adenocarcinoma       | 68                | 0.78 (0.59-1.04)            | 0.89 (0.68-1.16)            | 1.01 (0.77-1.33)            |
| Rectal                           | 209               | 0.96 (0.83-1.12)            | 0.99 (0.85-1.14)            | 1.00 (0.86-1.16)            |
| Melanoma skin                    | 328               | 0.90 (0.79-1.01)            | 0.89 (0.79-1.01)            | 0.90 (0.80-1.03)            |
| Non-Hodgkin lymphoma             | 316               | 0.85 (0.75-0.96)            | 0.85 (0.75-0.97)            | 0.87 (0.76-0.99)            |
| Pancreas                         | 145               | 0.84 (0.69-1.01)            | 0.86 (0.71-1.04)            | 0.90 (0.74-1.09)            |
| Prostate                         | 1 380             | 1.05 (0.99-1.11)            | 1.04 (0.98-1.10)            | 1.03 (0.97-1.10)            |

The standard deviation (SD) of physical activity was 8.3 milligravity unit in the main analytical sample. Hazard ratios (HR) and 95% confidence intervals (CI) were estimated using a Cox proportional hazards model. Models used age as the underlying time variable. Model 1: Unadjusted. Model 2: adjusted for sex, ethnicity, smoking status, alcohol consumption, deprivation, and education. Model 3: Model 2 + adjusted for body mass index. For breast cancer and endometrial cancer, Model 2 and Model 3 were adjusted for ever use of oral contraception, ever use of hormone replacement therapy, menopausal status, and parity. Participants were limited to males for prostate cancer (N=38 078), females for breast cancer (N=48 478), and females without a history of hysterectomy for endometrial cancer (N=41 010).

**eTable 6. Sequential model adjustments for quintile of total physical activity (milligravity units), quintile of median daily step count, and risk of incident physical-activity-related cancer in 86 556 UK Biobank participants.**

|                                           |        |            | Model 1          | Model 2          | Model 3          | Model 4          |
|-------------------------------------------|--------|------------|------------------|------------------|------------------|------------------|
| Quintile of total daily physical activity | Total  | Case count | HR (95% CI)      | HR (95% CI)      | HR (95% CI)      | HR (95% CI)      |
| Q1: <21.6                                 | 17 311 | 718        | REF              | REF              | REF              | REF              |
| Q2: 21.6-25.4                             | 17 311 | 569        | 0.84 (0.75-0.93) | 0.84 (0.75-0.93) | 0.86 (0.77-0.96) | 0.84 (0.75-0.94) |
| Q3: 25.5-29.1                             | 17 311 | 522        | 0.80 (0.71-0.89) | 0.79 (0.71-0.89) | 0.83 (0.74-0.93) | 0.80 (0.71-0.90) |
| Q4: 29.2-34.2                             | 17 311 | 460        | 0.74 (0.65-0.83) | 0.74 (0.65-0.83) | 0.78 (0.69-0.88) | 0.75 (0.66-0.84) |
| Q5: 34.3+                                 | 17 312 | 400        | 0.69 (0.61-0.78) | 0.70 (0.61-0.79) | 0.76 (0.66-0.86) | 0.71 (0.62-0.80) |
| <i>P</i> value for linear trend           |        |            | <0.001           | <0.001           | <0.001           | <0.001           |
| Quintile of daily step count              | Total  | Case count | HR (95% CI)      | HR (95% CI)      | HR (95% CI)      | HR (95% CI)      |
| Q1: < 6 319                               | 17 308 | 687        | REF              | REF              | REF              | REF              |
| Q2: 6 319-8 187                           | 17 302 | 542        | 0.80 (0.71-0.90) | 0.82 (0.74-0.92) | 0.85 (0.76-0.95) | 0.85 (0.74-0.98) |
| Q3: 8 188-10 009                          | 17 315 | 513        | 0.76 (0.68-0.85) | 0.79 (0.71-0.89) | 0.83 (0.74-0.93) | 0.83 (0.72-0.95) |
| Q4: 10 010-12 415                         | 17 318 | 494        | 0.74 (0.66-0.83) | 0.78 (0.69-0.88) | 0.83 (0.73-0.93) | 0.79 (0.69-0.91) |
| Q5: 12 416+                               | 17 313 | 433        | 0.66 (0.59-0.75) | 0.71 (0.63-0.80) | 0.76 (0.67-0.86) | 0.76 (0.66-0.88) |
| <i>P</i> value for linear trend           |        |            | <0.001           | <0.001           | <0.001           | <0.001           |

Hazard ratios (HR) and 95% confidence intervals (CI) were estimated using a Cox proportional hazards model. Physical-activity-related cancer was defined as 13 site specific cancers (oesophageal adenocarcinoma, liver, lung, kidney, gastric cardia, endometrial, myeloid leukaemia, myeloma, colon, head and neck, rectal, bladder, and breast). Models used age as the underlying time variable. Model 1: Unadjusted. Model 2: adjusted for sex, ethnicity, smoking status, alcohol consumption, deprivation, and education. Model 3: Model 2 + adjusted for body mass index. Model 4: Model 2 + adjusted for fruit and vegetable intake, and red and processed meat intake. REF = reference.

**eTable 7. Changes in behaviour time and physical-activity-related cancer risk in 86 556 UK Biobank participants.**

|                                 | <b>Model 1</b>     | <b>Model 2</b>     | <b>Model 3</b>     | <b>Model 4</b>     |
|---------------------------------|--------------------|--------------------|--------------------|--------------------|
| <b>Change in behaviour time</b> | <b>HR (95% CI)</b> | <b>HR (95% CI)</b> | <b>HR (95% CI)</b> | <b>HR (95% CI)</b> |
| 1 hour/day to LIPA from SB      | 0.97 (0.95-1.00)   | 0.94 (0.92-0.96)   | 0.95 (0.93-0.97)   | 0.94 (0.92-0.96)   |
| 1 hour/day to MVPA from SB      | 0.87 (0.84-0.90)   | 0.92 (0.89-0.95)   | 0.94 (0.91-0.98)   | 0.92 (0.89-0.95)   |
| 1 hr/day to Any PA from SB      | 0.94 (0.93-0.96)   | 0.93 (0.91-0.95)   | 0.94 (0.92-0.96)   | 0.93 (0.91-0.95)   |
| 1 hr/day to MVPA from LIPA      | 0.90 (0.86-0.93)   | 0.99 (0.94-1.03)   | 1.00 (0.96-1.05)   | 0.99 (0.94-1.03)   |

Hazard ratios (HR) and 95% confidence intervals (CI) for incident physical-activity-related cancer associated with reallocating time to from one behaviour to another behaviour. Models are based on 2 669 events in 86 556 participants. HRs are relative to the mean behaviour composition (8.1 hours/day sleep, 10.5 hours/day sedentary behaviour (SB), 4.9 hours/day light intensity physical activity behaviours (LIPA), 0.46 hours/day (27.4 minutes/day) moderate-vigorous intensity physical (MVPA) activity behaviours). The “Any PA” category represents time in either LIPA or MVPA and was generated using a combined category for LIPA and MVPA activity time. Physical-activity-related cancer was defined as 13 site specific cancers (oesophageal adenocarcinoma, liver, lung, kidney, gastric cardia, endometrial, myeloid leukaemia, myeloma, colon, head and neck, rectal, bladder, and breast). Models used age as the underlying time variable. Model 1: Unadjusted. Model 2: adjusted for sex, ethnicity, smoking status, alcohol consumption, deprivation, and education. Model 3: Model 2 + adjusted for body mass index. Model 4: Model 2 + adjusted for fruit and vegetable intake, and red and processed meat intake. Models are based on 2 669 events in 86 556 participants.

**eTable 8. Sequential model adjustments for median daily step count and physical-activity-related cancer risk in 86 556 UK Biobank participants.**

|                                           | <b>Model 1</b>     | <b>Model 2</b>     | <b>Model 3</b>     | <b>Model 4</b>     | <b>Model 5</b>     |
|-------------------------------------------|--------------------|--------------------|--------------------|--------------------|--------------------|
| <b>Median daily steps</b>                 | <b>HR (95% CI)</b> | <b>HR (95% CI)</b> | <b>HR (95% CI)</b> | <b>HR (95% CI)</b> | <b>HR (95% CI)</b> |
| 3 000                                     | 1.27 (1.11 - 1.45) | 1.22 (1.07 - 1.40) | 1.19 (1.04 - 1.36) | 1.22 (1.07 - 1.39) | 1.22 (1.04 - 1.44) |
| 5 000 (REF, ~10 <sup>th</sup> percentile) | 1.00 (1.00 - 1.00) | 1.00 (1.00 - 1.00) | 1.00 (1.00 - 1.00) | 1.00 (1.00 - 1.00) | 1.00 (1.00 - 1.00) |
| 7 000                                     | 0.86 (0.80 - 0.92) | 0.88 (0.82 - 0.94) | 0.90 (0.83 - 0.96) | 0.88 (0.82 - 0.94) | 0.88 (0.80 - 0.96) |
| 9 000                                     | 0.79 (0.71 - 0.87) | 0.82 (0.74 - 0.90) | 0.85 (0.77 - 0.94) | 0.82 (0.74 - 0.91) | 0.82 (0.73 - 0.93) |
| 11 000                                    | 0.76 (0.68 - 0.84) | 0.79 (0.71 - 0.88) | 0.84 (0.75 - 0.93) | 0.80 (0.72 - 0.89) | 0.79 (0.70 - 0.90) |
| 13 000                                    | 0.73 (0.65 - 0.82) | 0.77 (0.69 - 0.86) | 0.82 (0.73 - 0.92) | 0.78 (0.69 - 0.87) | 0.78 (0.67 - 0.89) |
| 16 000 (~95 <sup>th</sup> percentile)     | 0.66 (0.57 - 0.77) | 0.71 (0.61 - 0.82) | 0.76 (0.65 - 0.88) | 0.72 (0.61 - 0.83) | 0.75 (0.62 - 0.90) |
| <i>P</i> value for linear trend           | <0.001             | <0.001             | <0.001             | <0.001             | <0.001             |

Estimated hazard ratios (HR) and 95% confidence intervals (CI) were computed using a Cox proportional hazards model with restricted cubic spline functions. Observations were trimmed at the 1% and 99% of the distribution and 3 knots were placed at the 5th, 50th, and 95<sup>th</sup> percentile for the exposures in the main sample. The ~10<sup>th</sup> percentile was set as the referent group (5 000 steps). Physical-activity-related cancer was defined as 13 site specific cancers (oesophageal adenocarcinoma, liver, lung, kidney, gastric cardia, endometrial, myeloid leukaemia, myeloma, colon, head and neck, rectal, bladder, and breast). Models used age as the underlying time variable. Model 1: Unadjusted. Model 2: adjusted for sex, ethnicity, smoking status, alcohol consumption, deprivation, and education. Model 3: Model 2 + adjusted for body mass index. Model 4 + adjusted for fruit and vegetable intake, and red and processed meat intake. Model 5: Model 2 with 2-year exclusion, N=81 790. REF = reference.

**eTable 9. Sequential model adjustments for total physical activity (milligravity units) and risk of incident cancer in the UK Biobank among 38 078 male UK Biobank participants.**

|                                  |                   | <b>Model 1</b>              | <b>Model 2</b>              | <b>Model 3</b>              |
|----------------------------------|-------------------|-----------------------------|-----------------------------|-----------------------------|
| <b>Cancer type</b>               | <b>Case count</b> | <b>HR per 1 SD (95% CI)</b> | <b>HR per 1 SD (95% CI)</b> | <b>HR per 1 SD (95% CI)</b> |
| Physical-activity-related cancer | 898               | 0.77 (0.71-0.84)            | 0.80 (0.74-0.87)            | 0.84 (0.78-0.91)            |
| Bladder                          | 86                | 0.70 (0.54-0.92)            | 0.72 (0.56-0.95)            | 0.76 (0.58-1.00)            |
| Breast                           | NA                | NA                          | NA                          | NA                          |
| Colon                            | 207               | 0.77 (0.65-0.91)            | 0.76 (0.64-0.90)            | 0.80 (0.67-0.95)            |
| Endometrial                      | NA                | NA                          | NA                          | NA                          |
| Gastric cardia                   | 18                | 0.34 (0.17-0.67)            | 0.41 (0.21-0.79)            | 0.49 (0.25-0.98)            |
| Head and neck                    | 68                | 0.86 (0.65-1.13)            | 0.91 (0.69-1.18)            | 0.88 (0.67-1.16)            |
| Kidney                           | 83                | 0.85 (0.66-1.09)            | 0.89 (0.69-1.13)            | 0.90 (0.70-1.16)            |
| Liver                            | 34                | 0.76 (0.50-1.15)            | 0.77 (0.51-1.17)            | 0.84 (0.55-1.29)            |
| Lung                             | 148               | 0.54 (0.43-0.68)            | 0.64 (0.52-0.80)            | 0.68 (0.54-0.84)            |
| Myeloid Leukaemia                | 18                | 1.04 (0.63-1.72)            | 1.11 (0.67-1.82)            | 1.26 (0.76-2.10)            |
| Myeloma                          | 61                | 0.92 (0.69-1.22)            | 0.93 (0.70-1.24)            | 0.94 (0.70-1.27)            |
| Oesophageal adenocarcinoma       | 56                | 0.83 (0.61-1.13)            | 0.89 (0.66-1.20)            | 1.01 (0.74-1.38)            |
| Rectal                           | 121               | 0.95 (0.78-1.16)            | 0.96 (0.79-1.17)            | 0.98 (0.80-1.20)            |
| Melanoma skin                    | 181               | 0.90 (0.77-1.07)            | 0.88 (0.75-1.05)            | 0.90 (0.76-1.08)            |
| Non-Hodgkin lymphoma             | 176               | 0.91 (0.77-1.08)            | 0.90 (0.75-1.07)            | 0.91 (0.76-1.09)            |
| Pancreas                         | 80                | 0.84 (0.64-1.09)            | 0.86 (0.66-1.11)            | 0.93 (0.71-1.21)            |
| Prostate                         | 1 380             | 1.05 (0.99-1.11)            | 1.04 (0.98-1.10)            | 1.03 (0.97-1.10)            |

The standard deviation (SD) of physical activity was 8.3 milligravity unit in the main analytical sample. Hazard ratios (HR) and 95% confidence intervals (CI) were estimated using a Cox proportional hazards model. Models used age as the underlying time variable. Model 1: Unadjusted. Model 2: adjusted for ethnicity, smoking status, alcohol consumption, deprivation, and education. Model 3: Model 2 + adjusted for body mass index.

**eTable 10. Sequential model adjustments for total physical activity (milligravity units) and risk of incident cancer in the UK Biobank among 48 478 female UK Biobank participants.**

|                                  |                   | <b>Model 1</b>              | <b>Model 2</b>              | <b>Model 3</b>              |
|----------------------------------|-------------------|-----------------------------|-----------------------------|-----------------------------|
| <b>Cancer type</b>               | <b>Case count</b> | <b>HR per 1 SD (95% CI)</b> | <b>HR per 1 SD (95% CI)</b> | <b>HR per 1 SD (95% CI)</b> |
| Physical-activity-related cancer | 1 771             | 0.87 (0.83-0.92)            | 0.88 (0.84-0.93)            | 0.90 (0.86-0.95)            |
| Bladder                          | 23                | 0.56 (0.33-0.94)            | 0.54 (0.31-0.91)            | 0.52 (0.30-0.90)            |
| Breast                           | 995               | 0.90 (0.85-0.97)            | 0.91 (0.85-0.97)            | 0.91 (0.85-0.98)            |
| Colon                            | 174               | 0.95 (0.80-1.12)            | 0.94 (0.80-1.11)            | 0.96 (0.81-1.14)            |
| Endometrial                      | 153               | 0.76 (0.63-0.91)            | 0.78 (0.65-0.93)            | 0.89 (0.74-1.07)            |
| Gastric cardia                   | <5 <sup>a</sup>   | NA                          | NA                          | NA                          |
| Head and neck                    | 20                | 0.55 (0.32-0.96)            | 0.61 (0.36-1.05)            | 0.59 (0.34-1.04)            |
| Kidney                           | 58                | 0.78 (0.58-1.06)            | 0.82 (0.61-1.11)            | 0.88 (0.64-1.19)            |
| Liver                            | 26                | 0.48 (0.29-0.80)            | 0.50 (0.30-0.84)            | 0.55 (0.32-0.93)            |
| Lung                             | 147               | 0.75 (0.62-0.91)            | 0.86 (0.71-1.04)            | 0.87 (0.72-1.06)            |
| Myeloid Leukaemia                | 25                | 0.89 (0.57-1.38)            | 0.89 (0.57-1.39)            | 0.90 (0.57-1.42)            |
| Myeloma                          | 46                | 0.99 (0.72-1.36)            | 1.01 (0.74-1.39)            | 1.08 (0.79-1.49)            |
| Oesophageal adenocarcinoma       | 12                | 0.80 (0.41-1.55)            | 0.89 (0.46-1.72)            | 1.02 (0.51-2.01)            |
| Rectal                           | 88                | 1.02 (0.82-1.27)            | 1.02 (0.82-1.28)            | 1.03 (0.82-1.29)            |
| Melanoma skin                    | 147               | 0.92 (0.77-1.09)            | 0.90 (0.75-1.08)            | 0.90 (0.75-1.09)            |
| Non-Hodgkin lymphoma             | 140               | 0.80 (0.66-0.97)            | 0.81 (0.67-0.98)            | 0.82 (0.67-1.00)            |
| Pancreas                         | 65                | 0.86 (0.65-1.14)            | 0.88 (0.66-1.17)            | 0.87 (0.65-1.17)            |
| Prostate                         | NA                | NA                          | NA                          | NA                          |

The standard deviation (SD) of physical activity was 8.3 milligravity unit in the main analytical sample. Hazard ratios (HR) and 95% confidence intervals (CI) were estimated using a Cox proportional hazards model. Models used age as the underlying time variable. Model 1: Unadjusted. Model 2: Adjusted for ethnicity, smoking status, alcohol consumption, deprivation, education, ever use of oral contraception, ever use of hormone replacement therapy, menopausal status, and parity. Model 3: Model 2 + adjusted for body mass index. Participants were limited to females without a history of hysterectomy for endometrial cancer, N=41 010. <sup>a</sup>UK Biobank policy states that tables should have a minimum number of 5 reported participants within a cell.

**eTable 11. Sex-specific adjusted hazard ratios for median daily step count and physical-activity-related cancer risk in 38 078 male UK Biobank participants and 48 478 female UK Biobank participants.**

|                                           | Male               | Female             |
|-------------------------------------------|--------------------|--------------------|
| Median daily steps                        | HR (95% CI)        | HR (95% CI)        |
| 3 000                                     | 1.42 (1.15 - 1.75) | 1.11 (0.93 - 1.33) |
| 5 000 (REF, ~10 <sup>th</sup> percentile) | 1.00 (1.00 - 1.00) | 1.00 (1.00 - 1.00) |
| 7 000                                     | 0.81 (0.72 - 0.91) | 0.92 (0.84 - 1.01) |
| 9 000                                     | 0.72 (0.61 - 0.85) | 0.87 (0.77 - 0.99) |
| 11 000                                    | 0.69 (0.57 - 0.82) | 0.86 (0.75 - 0.98) |
| 13 000                                    | 0.69 (0.57 - 0.84) | 0.82 (0.71 - 0.94) |
| 16 000 (~95 <sup>th</sup> percentile)     | 0.65 (0.50 - 0.84) | 0.74 (0.61 - 0.90) |
| <i>P</i> value for linear trend           | <0.001             | <0.001             |

Estimated hazard ratios (HR) and 95% confidence intervals (CI) were computed using a Cox proportional hazards model with restricted cubic spline functions. Observations were trimmed at the 1% and 99% of the distribution and 3 knots were placed at the 5<sup>th</sup>, 50<sup>th</sup>, and 95<sup>th</sup> percentile for the exposures in the main sample. The ~10<sup>th</sup> percentile was set as the referent group (5 000 steps). Physical-activity-related cancer was defined as 13 site specific cancers (oesophageal adenocarcinoma, liver, lung, kidney, gastric cardia, endometrial, myeloid leukaemia, myeloma, colon, head and neck, rectal, bladder, and breast). Models used attained age as the underlying time variable and were adjusted for ethnicity, smoking status, alcohol consumption, deprivation, and education. The overall model was further adjusted for sex and the female model was further adjusted for ever use of oral contraception, ever use of hormone replacement therapy, menopausal status, and parity. REF = reference.



**eTable 12. Models for quintile of total physical activity (milligravity units), quintile of median daily step count, and risk of incident physical-activity-related cancer in UK Biobank participants who were never smokers (N=49 736).**

| <b>Quintile of physical activity</b> | <b>Total</b> | <b>Case count</b> | <b>HR (95% CI)</b> |
|--------------------------------------|--------------|-------------------|--------------------|
| Q1: <22.0                            | 9 947        | 335               | REF                |
| Q2: 22.0-25.7                        | 9 946        | 269               | 0.83 (0.70-0.97)   |
| Q3: 25.8-29.5                        | 9 948        | 265               | 0.83 (0.71-0.98)   |
| Q4: 29.6-34.5                        | 9 947        | 244               | 0.80 (0.67-0.94)   |
| Q5: 34.6+                            | 9 948        | 195               | 0.68 (0.57-0.82)   |
| <i>P</i> value for linear trend      |              |                   | <0.001             |
| <b>Quintile of daily step count</b>  | <b>Total</b> | <b>Case count</b> | <b>HR (95% CI)</b> |
| Q1: <6 480                           | 9 941        | 308               | REF                |
| Q2: 6 480-8 318                      | 9 953        | 281               | 0.93 (0.79-1.09)   |
| Q3: 8 319-10 109                     | 9 943        | 253               | 0.84 (0.71-0.99)   |
| Q4: 10 110-12 469                    | 9 951        | 255               | 0.85 (0.72-1.01)   |
| Q5: 12, 470+                         | 9 948        | 211               | 0.73 (0.61-0.87)   |
| <i>P</i> value for linear trend      |              |                   | 0.001              |

Physical-activity-related cancer was defined as 13 site specific cancers (oesophageal adenocarcinoma, liver, lung, kidney, gastric cardia, endometrial, myeloid leukaemia, myeloma, colon, head and neck, rectal, bladder, and breast). Hazard ratios (HR) and 95% confidence intervals (CI) were estimated using a Cox proportional hazards model. Models used age as the underlying time variable. Model was adjusted for sex, ethnicity, alcohol consumption, deprivation, and education. REF = reference.

**eTable 13. Models for quintile of total physical activity (milligravity units), quintile of median daily step count, and risk of incident physical-activity-related cancer in 86 556 UK Biobank participants before and after removing the first two years of follow-up (N=83 435).**

| <b>Quintile of physical activity</b> | <b>Total</b> | <b>Case count</b> | <b>HR (95% CI)</b> |
|--------------------------------------|--------------|-------------------|--------------------|
| Q1: <21.7                            | 16 687       | 480               | REF                |
| Q2: 21.7-25.4                        | 16 687       | 374               | 0.83 (0.72-0.95)   |
| Q3: 25.5-29.2                        | 16 687       | 367               | 0.84 (0.73-0.96)   |
| Q4: 29.3-34.3                        | 16 687       | 320               | 0.77 (0.67-0.89)   |
| Q5: 34.4+                            | 16 687       | 280               | 0.73 (0.63-0.85)   |
| <i>P</i> value for linear trend      |              |                   | 0.001              |
| <b>Quintile of daily step count</b>  | <b>Total</b> | <b>Case count</b> | <b>HR (95% CI)</b> |
| Q1: < 6 343                          | 16 687       | 456               | REF                |
| Q2: 6 343-8 205                      | 16 683       | 371               | 0.85 (0.74-0.98)   |
| Q3: 8 206-10 021                     | 16 689       | 353               | 0.83 (0.72-0.95)   |
| Q4: 10 022-12 433                    | 16 682       | 333               | 0.79 (0.69-0.91)   |
| Q5: 12 434+                          | 16 694       | 308               | 0.76 (0.66-0.88)   |
| <i>P</i> value for linear trend      |              |                   | <0.001             |

Hazard ratios (HR) and 95% confidence intervals (CI) were estimated using a Cox proportional hazards model. Physical-activity-related cancer was defined as 13 site specific cancers (oesophageal adenocarcinoma, liver, lung, kidney, gastric cardia, endometrial, myeloid leukaemia, myeloma, colon, head and neck, rectal, bladder, and breast). Models used age as the underlying time variable. Model was adjusted for sex, ethnicity, smoking status, alcohol consumption, deprivation, and education. REF = reference.

**eFigure 1. Participant flow diagram for the analysis of daily physical activity and step count measured by accelerometers in UK Biobank participants.**

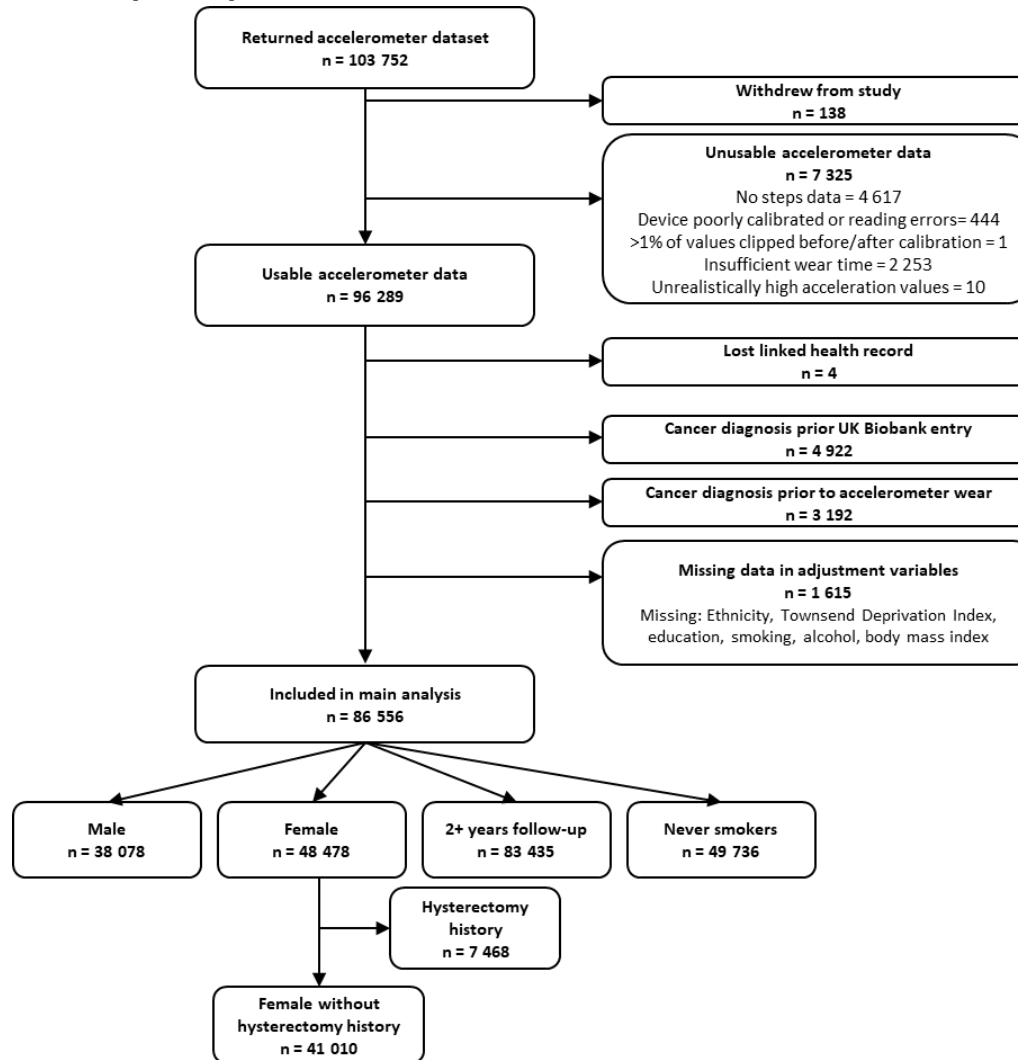

**eFigure 2. Hazard Ratios reallocating time to a given movement behaviour from all other behaviours proportionally and incident physical-activity-related cancer in 86 556 UK Biobank participants.**

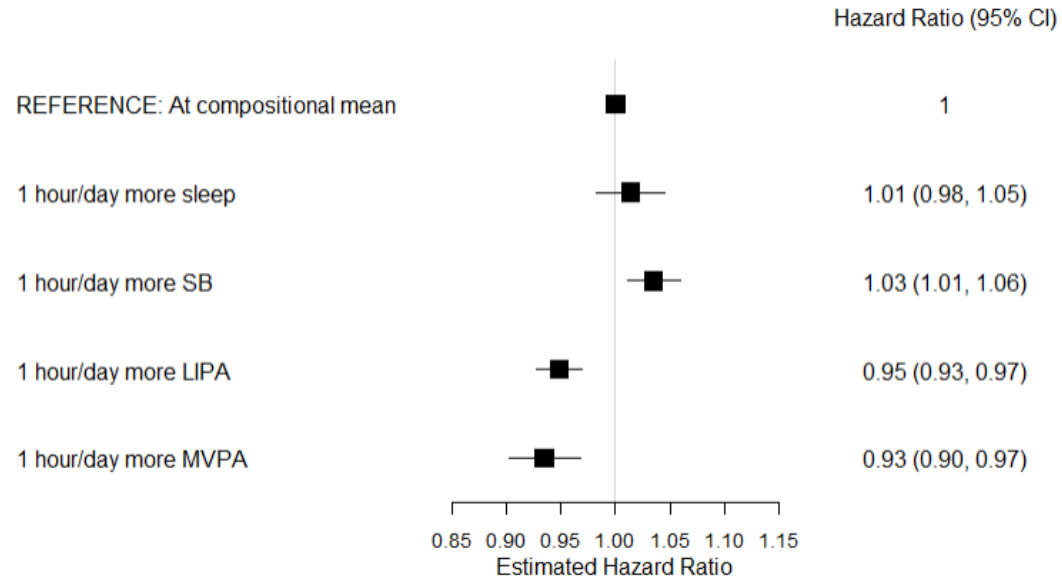

Hazard ratios (HR) and 95% confidence intervals (CI) for incident physical-activity-related cancer associated with reallocating time to from one behaviour to another behaviour proportionally. Models are based on 2 669 events in 86 556 participants. Hazard ratios are relative to the mean behaviour composition (8.1 hours/day sleep, 10.5 hours/day sedentary behaviour (SB), 4.9 hours/day light intensity physical activity behaviours (LIPA), 0.46 hours/day (27.4 minutes/day) moderate-vigorous intensity physical (MVPA) activity behaviours). Models used attained age as the underlying time variable and were adjusted for sex, ethnicity, smoking status, alcohol consumption, deprivation, and education. Models are based on 2 669 events in 86 556 participants.

**eFigure 3. Hazard ratios for all behaviour pairs and incident physical-activity-related cancer risk for estimated using a multivariable-adjusted Cox regression model in 86 556 UK Biobank participants before (blue) and after adjusting for body mass index as a sensitivity analysis.**

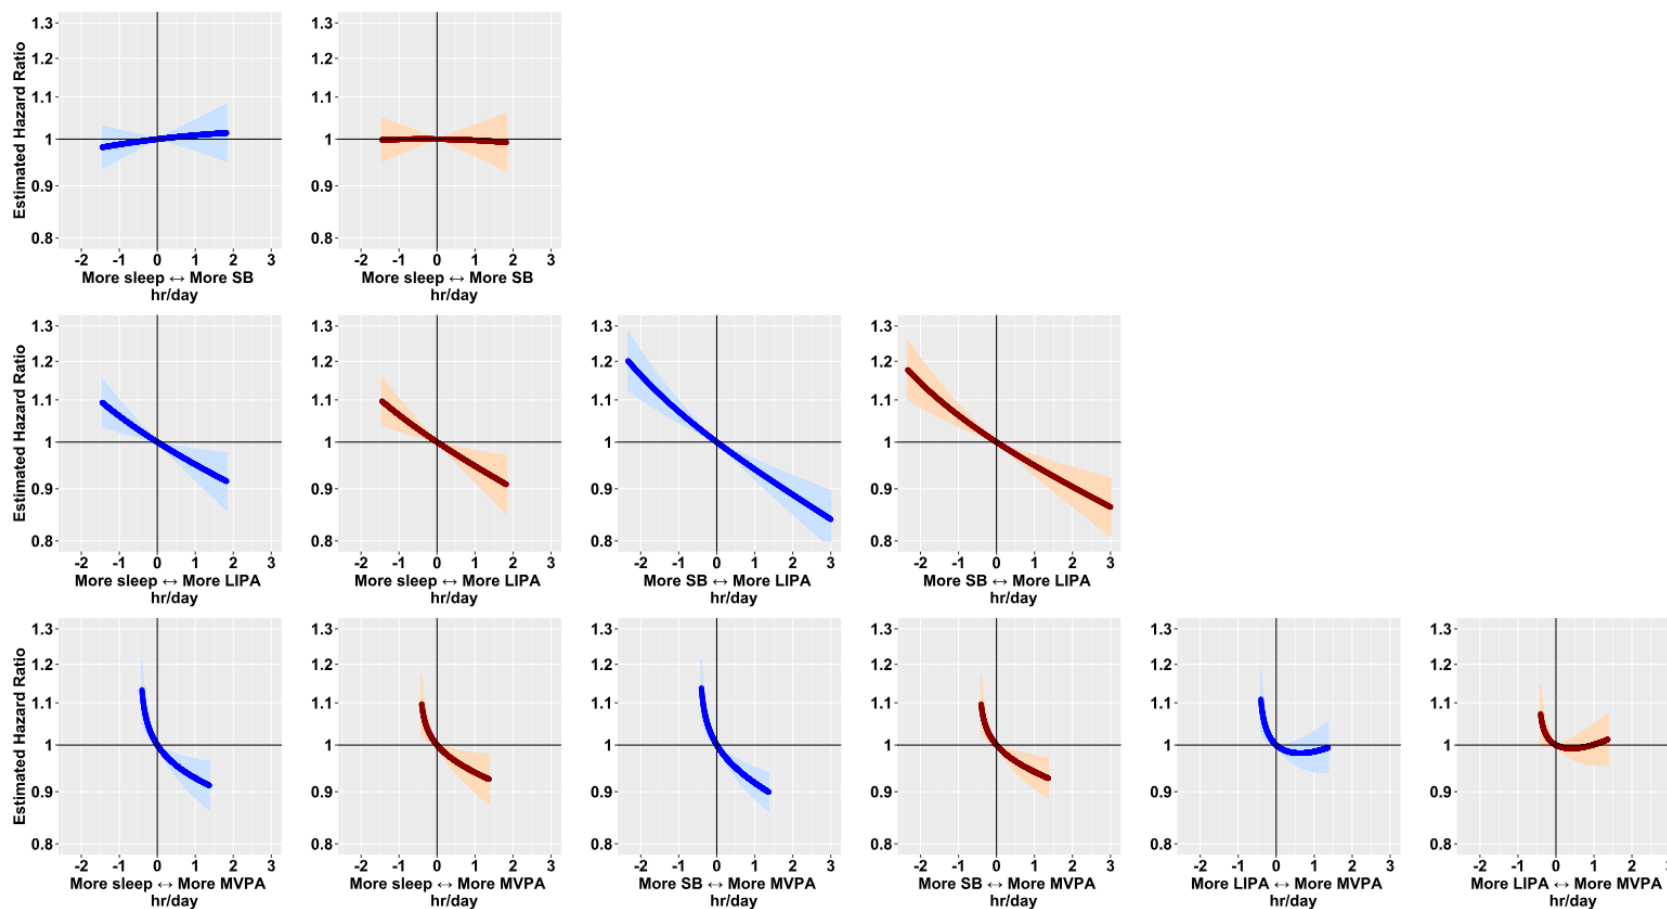

Hazard ratios are relative to the mean behaviour composition (8.1 hours/day sleep, 10.5 hours/day sedentary behaviour, 4.9 hours/day light intensity physical activity behaviours, 0.46 hours/day (27.4 minutes/day) moderate-vigorous intensity physical activity behaviours). Models used attained age as the underlying time variable and were adjusted for sex, ethnicity, smoking status, alcohol consumption, deprivation, and education. Models are based on 2 669 events in 86 556 participants. SB = sedentary behaviour, LIPA = light intensity activity, MVPA = moderate-vigorous intensity activity, hr = hour.

**eFigure 4. Hazard ratios for all behaviour pairs and incident physical-activity-related cancer risk for estimated using a multivariable-adjusted Cox regression model in 86 556 UK Biobank participants before (blue) and after adjusting for dietary factors as a sensitivity analysis.**

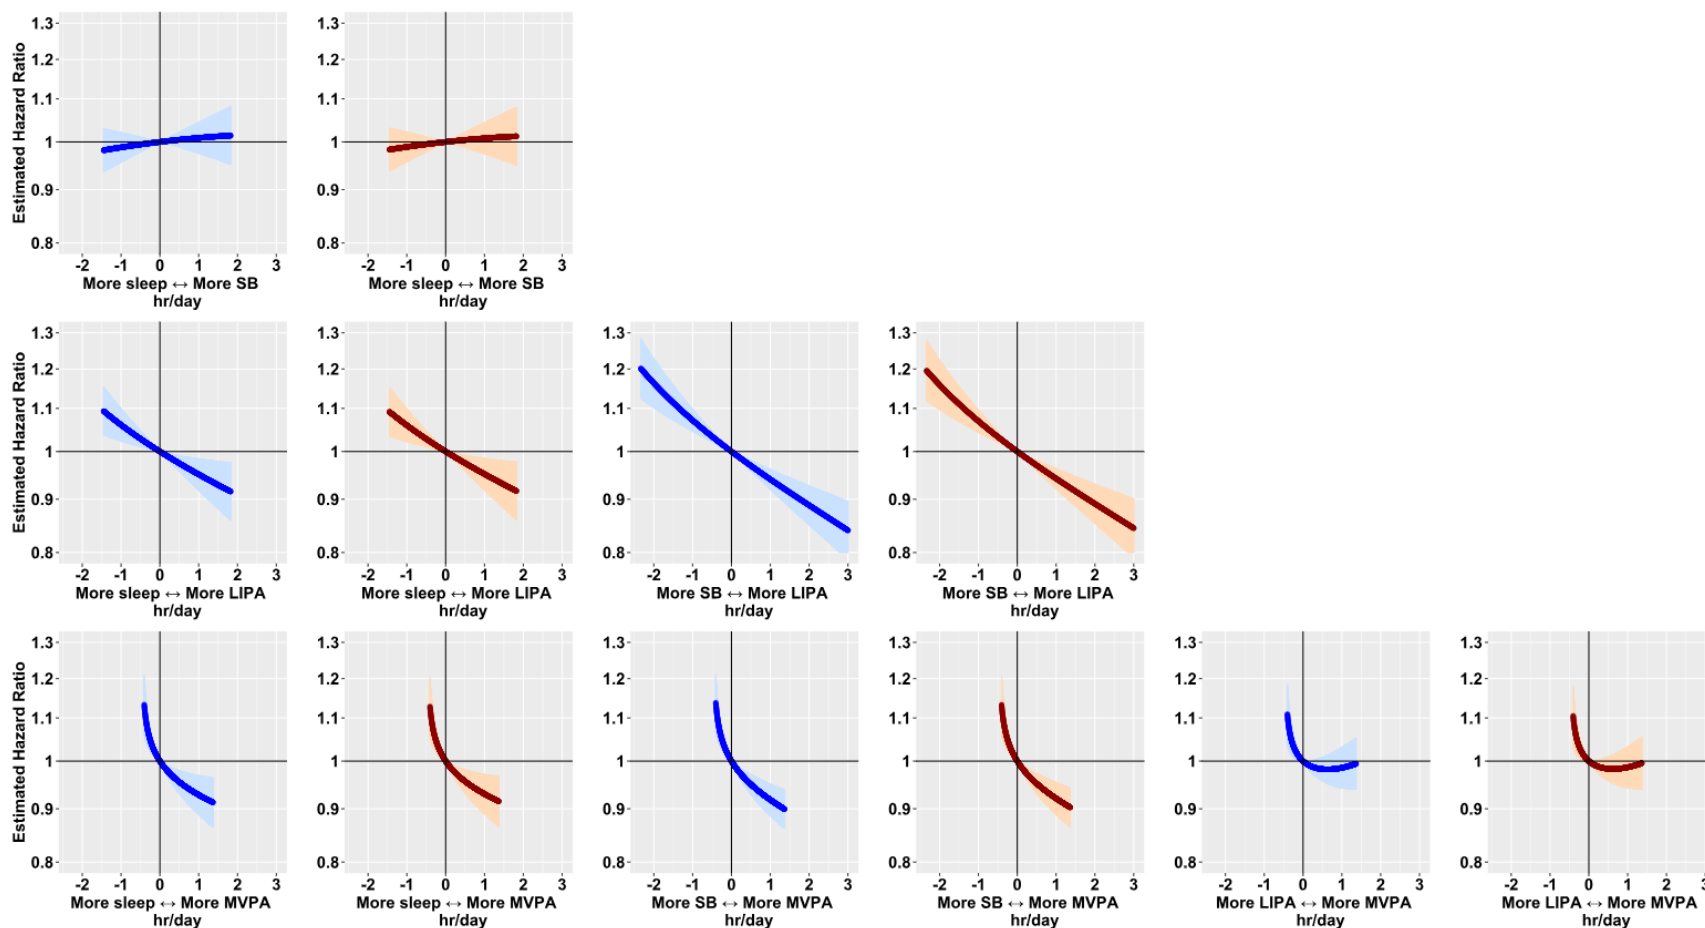

Hazard ratios are relative to the mean behaviour composition (8.1 hours/day sleep, 10.5 hours/day sedentary behaviour, 4.9 hours/day light intensity physical activity behaviours, 0.46 hours/day (27.4 minutes/day) moderate-vigorous intensity physical activity behaviours). Models used attained age as the underlying time variable and were adjusted for sex, ethnicity, smoking status, alcohol consumption, deprivation, and education. Models are based on 2 669 events in 86 556 participants. SB = sedentary behaviour, LIPA = light intensity activity, MVPA = moderate-vigorous intensity activity, hr = hour.

**eFigure 5. Hazard ratios for all behaviour pairs and incident physical-activity-related cancer risk for estimated using a multivariable-adjusted Cox regression model among 48 478 female participants (blue) and 38 078 male participants (red).**

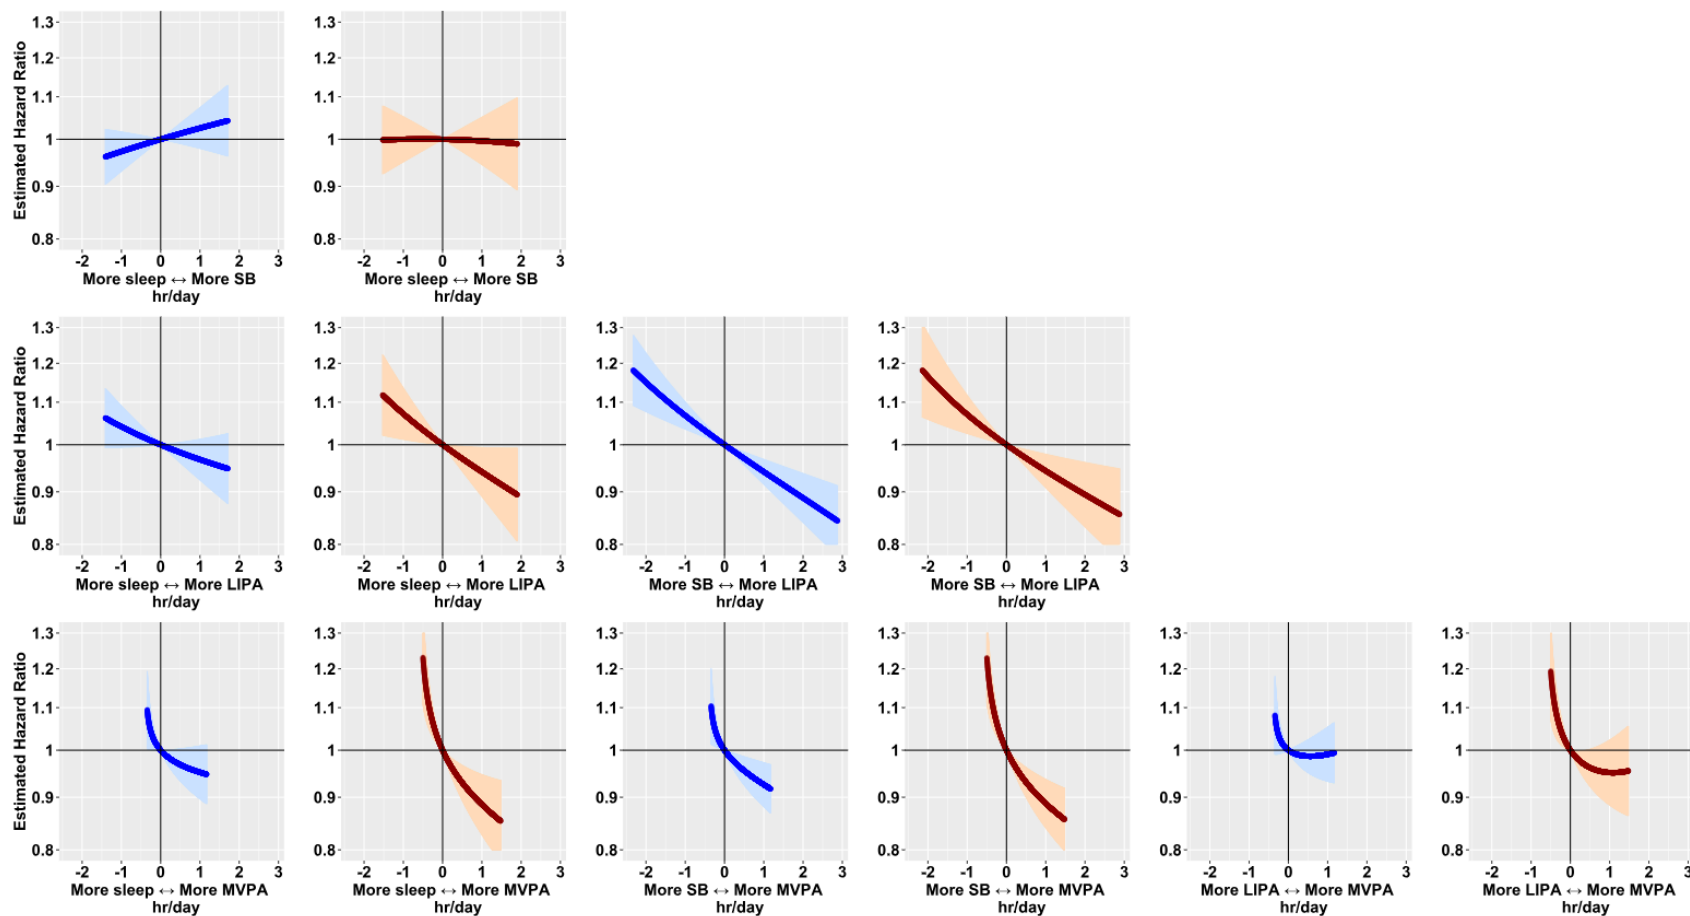

Hazard ratios are relative to the mean behaviour composition in each sex (female – 8.2 hours/day sleep, 10.1 hours/day sedentary behaviour, 5.3 hours/day light intensity physical activity behaviours, 0.38 hours/day (22.8 minutes/day) moderate-vigorous intensity physical activity behaviours; male – 7.9 hours/day sleep, 11.0 hours/day sedentary behaviour, 4.5 hours/day light intensity physical activity behaviours, 0.58 hours/day (35.0 minutes/day) moderate-vigorous intensity physical activity behaviours). Models used attained age as the underlying time variable and were adjusted for ethnicity, smoking status, alcohol consumption, deprivation, and education. Female models were further adjusted for ever use of oral contraception, ever use of hormone replacement therapy, menopausal status, and parity Model is based on 1 771 events in 48 478 female participants and 898 events in 38 078 male participants. SB = sedentary behaviour, LIPA = light intensity activity, MVPA = moderate-vigorous intensity activity, hr = hour.

**eFigure 6. Hazard ratios for all behaviour pairs and incident physical-activity-related cancer risk for estimated using a multivariable-adjusted Cox regression model in 86 556 UK Biobank participants before (blue) and after restricting to never smokers (red, N=49 736).**

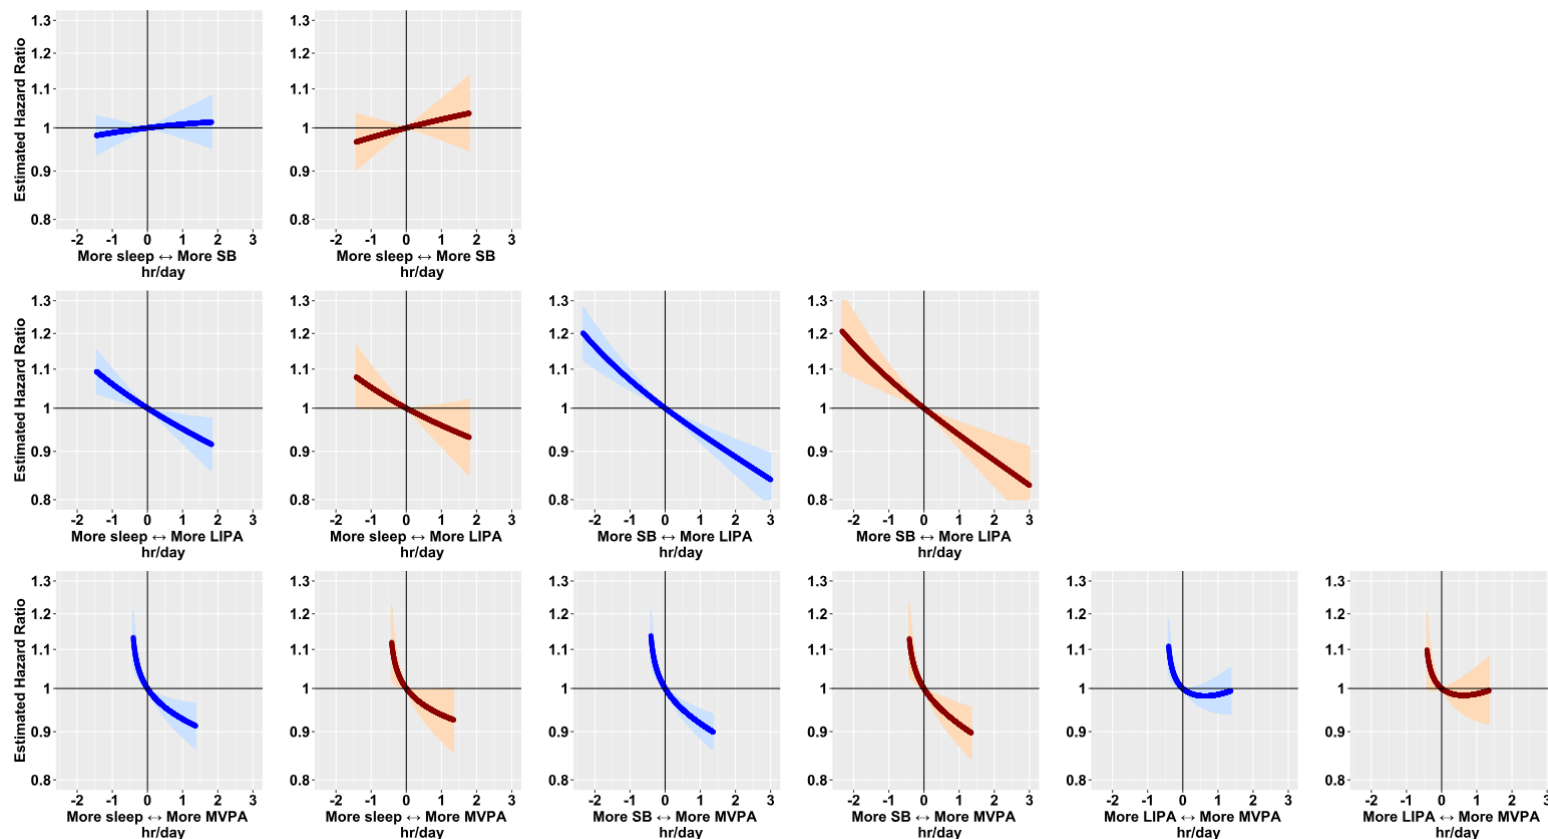

Hazard ratios are relative to the mean behaviour composition in each sample (full sample – 8.1 hours/day sleep, 10.5 hours/day sedentary behaviour, 4.9 hours/day light intensity physical activity behaviours, 0.46 hours/day (27.4 minutes/day) moderate-vigorous intensity physical activity behaviours; Non-smoking subgroup – 8.1 hours/day sleep, 10.4 hours/day sedentary behaviour, 5.0 hours/day light intensity physical activity behaviours, 0.48 hours/day (28.7 minutes/day) moderate-vigorous intensity physical activity behaviours). Models used attained age as the underlying time variable and were adjusted for ethnicity, smoking status, alcohol consumption, deprivation, and education. The main model is based on 2 669 events in 86 556 participants and the sensitivity analysis model is based on 1 308 events in 49 736 participants. SB = sedentary behaviour, LIPA = light intensity activity, MVPA = moderate-vigorous intensity activity, hr = hour.



**eFigure 7. Hazard ratios for all behaviour pairs and incident physical-activity-related cancer risk for estimated using a multivariable-adjusted Cox regression model in 86 556 UK Biobank participants before (blue) and after removing the first two years of follow-up (red, N=83 435).**

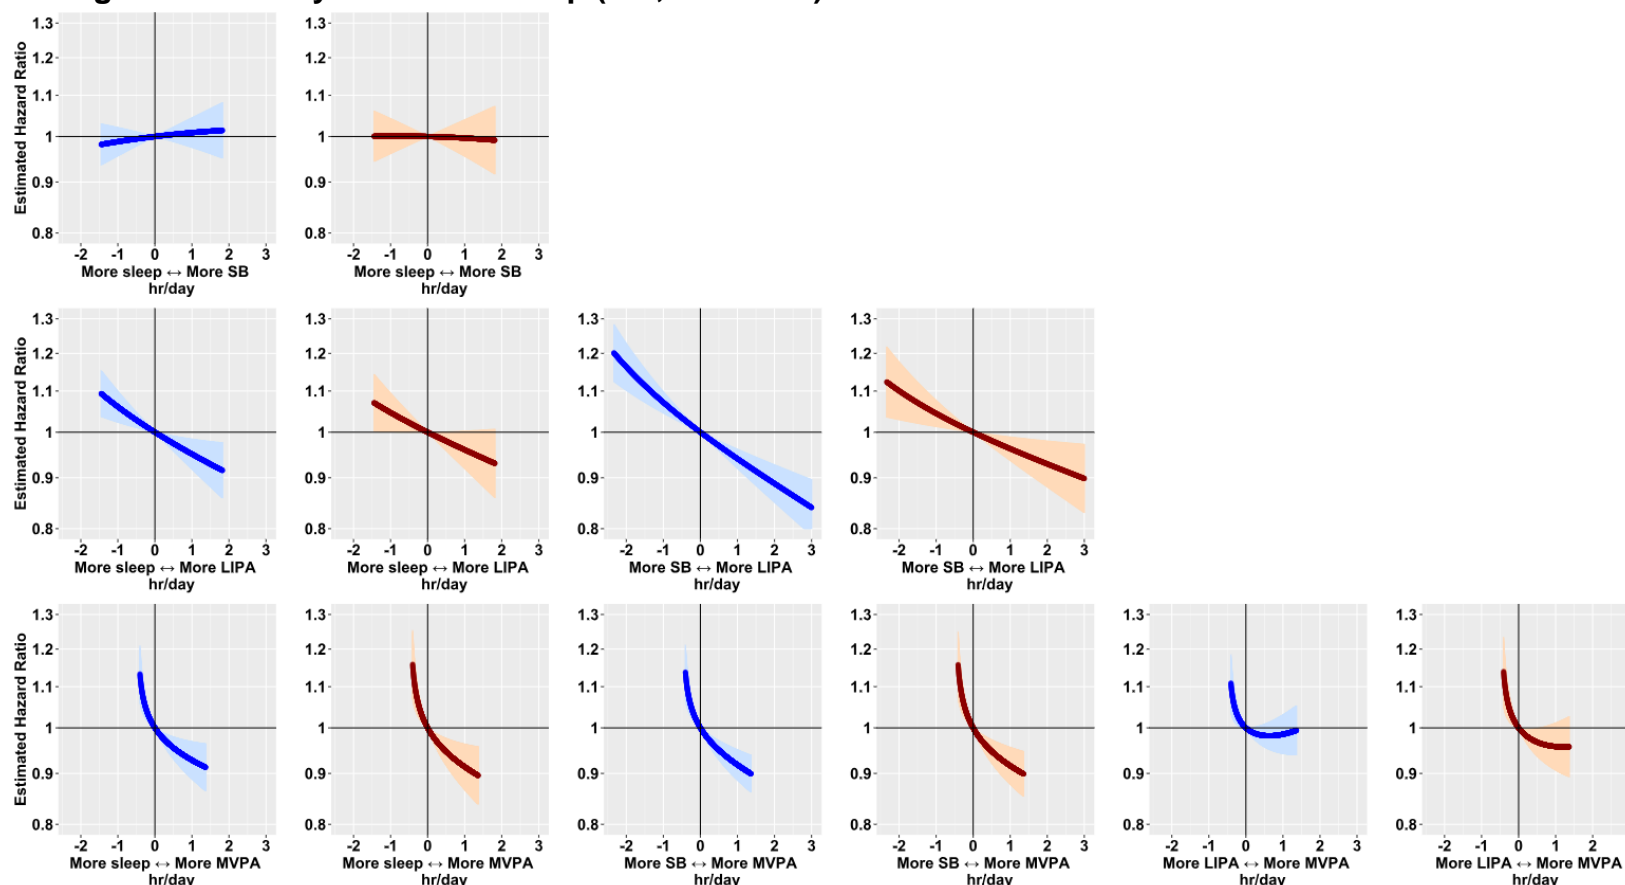

Hazard ratios are relative to the mean behaviour composition in each sample (full sample – 8.1 hours/day sleep, 10.5 hours/day sedentary behaviour, 4.9 hours/day light intensity physical activity behaviours, 0.46 hours/day (27.4 minutes/day) moderate-vigorous intensity physical activity behaviours; sample with at least 2-years follow-up – 8.1 hours/day sleep, 10.5 hours/day sedentary behaviour, 4.9 hours/day light intensity physical activity behaviours, 0.46 hours/day (27.6 minutes/day) moderate-vigorous intensity physical activity behaviours). Models used attained age as the underlying time variable and were adjusted for ethnicity, smoking status, alcohol consumption, deprivation, and education. The main model is based on 2 669 events in 86 556 participants and the sensitivity analysis model is based on 1 821 events in 83 435 participants. SB = sedentary behaviour, LIPA = light intensity activity, MVPA = moderate-vigorous intensity activity, hr = hour.
